# 1 **An ancestral interaction module promotes oligomerisation in divergent** 2 **mitochondrial ATP synthases**

3  
4 Ondřej Gahura<sup>1,†</sup>, Alexander Mühleip<sup>3,4,†</sup>, Carolina Hierro-Yap<sup>1,2</sup>, Brian Panicucci<sup>1</sup>, Minal  
5 Jain<sup>1,2</sup>, David Hollaus<sup>2</sup>, Martina Slapničková<sup>1</sup>, A. Amunts<sup>3,4,\*</sup>, Alena Zíková<sup>1,2,\*</sup>

6 <sup>1</sup>Institute of Parasitology, Biology Centre CAS, Ceske Budejovice, Czech Republic

7 <sup>2</sup>Faculty of Science, University of South Bohemia, Ceske Budejovice, Czech Republic

8 <sup>3</sup>Science for Life Laboratory, Department of Biochemistry and Biophysics, Stockholm  
9 University, 17165 Solna, Sweden

10 <sup>4</sup>Department of Medical Biochemistry and Biophysics, Karolinska Institutet, 17177  
11 Stockholm, Sweden

12

13

14 \*Correspondence to: [amunts@scilifelab.se](mailto:amunts@scilifelab.se); [azikova@paru.cas.cz](mailto:azikova@paru.cas.cz)

15 †These authors contributed equally to this work.

16

17

## 18 **Abstract**

19 Mitochondrial ATP synthase forms stable dimers arranged into oligomeric assemblies that  
20 generate the inner-membrane curvature essential for efficient energy conversion. Here, we  
21 report cryo-EM structures of the intact ATP synthase dimer from trypanosomes in 10 different  
22 rotational states. The model consists of 25 subunits, including 11 lineage-specific, as well as  
23 36 lipids. The rotary mechanism is influenced by the divergent peripheral stalk, conferring a  
24 greater conformational flexibility. Proton transfer in the luminal half-channel occurs via a  
25 chain of five ordered water molecules. The dimerization interface is formed by subunit-g that  
26 is critical for interactions but not for the catalytic activity. Although overall dimer architecture  
27 varies among eukaryotes, we find that subunit-g and -e form a common ancestral  
28 oligomerisation motif, which is shared between the trypanosomal and mammalian lineages.  
29 Therefore, our data defines the subunit-g/e module as a structural component determining ATP  
30 synthase oligomeric assemblies.

31

32

33

## 34 Main

35 Mitochondrial ATP synthase consists of the soluble F<sub>1</sub> and membrane-bound F<sub>o</sub> subcomplexes,  
36 and occurs in dimers that assemble into oligomers to induce the formation of cristae folds. The  
37 cristae folds are the sites for oxidative phosphorylation and energy conversion in eukaryotic  
38 cells. Dissociation of ATP synthase dimers into monomers results in the loss of native cristae  
39 architecture and impairs mitochondrial function<sup>1,2</sup>. While the cristae morphology varies  
40 substantially between organisms from different lineages, ranging from flat lamellar in  
41 opisthokonts to coiled tubular in ciliates and discoidal in euglenozoans<sup>3</sup>, the ATP synthase  
42 dimers represent a universal occurrence to maintain the membrane shape<sup>4</sup>.

43 ATP synthase dimers of variable size and architecture, classified into types I to IV have  
44 recently been resolved by high-resolution cryo-EM studies. In the structure of the type-I ATP  
45 synthase dimer from mammals, the monomers are only weakly associated<sup>5,6</sup>, and in yeast  
46 insertions in the membrane subunits form tighter contacts<sup>7</sup>. The structure of the type-II ATP  
47 synthase dimer from the alga *Polytomella* showed that the dimer interface is formed by  
48 phylum-specific components<sup>8</sup>. The type-III ATP synthase dimer from a ciliate *Tetrahymena* is  
49 characterized by parallel rotary axes, and a substoichiometric subunit, as well as multiple lipids  
50 were identified at the dimer interface, while additional protein components that tie the  
51 monomers together are distributed between the matrix, transmembrane, and luminal regions<sup>9</sup>.  
52 The structure of the type-IV ATP synthase with native lipids from *Euglena* also showed that  
53 specific protein-lipid interactions contribute to the dimerization, and that the central and  
54 peripheral stalks interact with each other directly<sup>10</sup>. Finally, a unique apicomplexan ATP  
55 synthase dimerises via 11 parasite-specific components that contribute ~7000 Å<sup>2</sup> buried surface  
56 area<sup>11</sup>, and unlike all other ATP synthases, that assemble into rows, it associates in higher  
57 oligomeric states of pentagonal pyramids in the curved apical membrane regions. Together, the  
58 available structural data suggest a diversity of oligomerisation, and it remains unknown  
59 whether common elements mediating these interactions exist or the dimerization of ATP  
60 synthase occurred independently and multiple times in evolution<sup>4</sup>.

61 The ATP synthase of *Trypanosoma brucei*, a representative of kinetoplastids an established  
62 medically important model organism causing the sleeping sickness, is highly divergent,  
63 exemplified by the pyramid-shaped F<sub>1</sub> head containing a phylum specific subunit<sup>12,13</sup>. The  
64 dimers are sensitive to the lack of cardiolipin<sup>14</sup> and form short left-handed helical segments  
65 that extend across the membrane ridge of the discoidal cristae<sup>15</sup>. Uniquely among aerobic  
66 eukaryotes, the mammalian life cycle stage of *T. brucei* utilizes the ATP synthase as a proton  
67 pump maintaining the mitochondrial membrane potential at the expense of ATP<sup>16,17</sup>, whereas  
68 the insect stage of the parasite employs the forward ATP-producing mode of the enzyme<sup>18,19</sup>.

69 Given the conservation of the core subunits, the different nature of oligomerisation and the  
70 ability to test structural hypotheses biochemically, we reasoned that investigation of the *T.*  
71 *brucei* ATP synthase structure and function would provide the missing evolutionary link to  
72 understand how the monomers interact to form physiological dimers. Here, we address this  
73 question by combining structural, functional and evolutionary analysis of the *T. brucei* ATP  
74 synthase dimer.

75

## 76 Results

### 77 Cryo-EM structure of the *T. brucei* ATP synthase

78 We purified ATP synthase dimers from cultured *T. brucei* procyclic trypomastigotes by affinity  
79 chromatography with a recombinant natural protein inhibitor TbIF<sub>1</sub><sup>20</sup>, and subjected to cryo-  
80 EM analysis (Supplementary Fig. 1 and 2). Using masked refinements, maps were obtained for  
81 the membrane region, the rotor, and the peripheral stalk. To further describe the conformational  
82 space of the *T. brucei* ATP synthase, we resolved 10 distinct rotary substates, which were  
83 refined to 3.5-4.3 Å resolution. Finally, particles with both monomers in rotational state 1 were  
84 selected, and the consensus structure of the dimer was refined to 3.2 Å resolution  
85 (Supplementary Table 1, Supplementary Fig. 2).

86 Unlike the wide-angle architecture of dimers found in animals and fungi, the *T. brucei* ATP  
87 synthase displays an angle of 60° between the two F<sub>1</sub>/c-ring subcomplexes. The model of the  
88 *T. brucei* ATP synthase includes all 25 different subunits, 11 of which are lineage-specific (Fig.  
89 1a, Supplementary Video 1, Supplementary Fig. 3). We named the subunits according to the  
90 previously proposed nomenclature<sup>21-23</sup> (Supplementary Table 2). In addition, we identified and  
91 modeled 36 bound phospholipids, including 24 cardiolipins (Supplementary Fig. 4). Both  
92 detergents used during purification, n-dodecyl β-D-maltoside (β-DDM) and glyco-diosgenin  
93 (GDN) are also resolved in the periphery of the membrane region (Supplementary Fig. 5).

94 In the catalytic region, F<sub>1</sub> is augmented by three copies of subunit p18, each bound to subunit-  
95 α<sup>12,13</sup>. Our structure shows that p18 is involved in the unusual attachment of F<sub>1</sub> to the peripheral  
96 stalk. The membrane region includes seven conserved F<sub>o</sub> subunits (*d*, *f*, 8, *i/j*, *k*, *e*, and *g*)  
97 arranged around the central proton translocator subunit-*a*. We identified those subunits based  
98 on the structural similarity and matching topology to their yeast counterparts (Fig 2).  
99 Surprisingly, the long helix-2 of subunit-*b* (*bH2*), which constitutes the central part of the  
100 peripheral stalk in other organisms and associates with subunit-*a* in the membrane, is absent in  
101 *T. brucei*. By contrast, *bH1* from the yeast structure superposes well with the single  
102 transmembrane helix of ATPTB14, which anchors the newly identified subunit-*e* and -*g* to the  
103 F<sub>o</sub> (Fig 2a). Therefore, ATPTB14 may represent a highly reduced homolog of subunit-*b*.

104 The membrane region contains a peripheral subcomplex, formed primarily by the phylum-  
105 specific ATPTB1,6,12 and ATPEG3 (Fig. 1b). It is separated from the conserved core by a  
106 membrane-intrinsic cavity, in which nine bound cardiolipins are resolved (Fig. 1c), and the  
107 C-terminus of ATPTB12 interacts with the luminal β-barrel of the c<sub>10</sub>-ring. In the cavity of the  
108 decameric c-ring near the matrix side, 10 Arg66<sub>c</sub> residues coordinate a ligand density, which  
109 is consistent with a pyrimidine ribonucleoside triphosphate (Fig. 1d). We assign this density as  
110 uridine-triphosphate (UTP), due to its large requirement in the mitochondrial RNA metabolism  
111 of African trypanosomes being a substrate for post-transcriptional RNA editing<sup>24</sup>, and addition  
112 of poly-uridine tails to gRNAs and rRNAs<sup>25,26</sup>, as well as due to low abundance of cytidine  
113 triphosphate (CTP)<sup>27</sup>. The nucleotide base is inserted between two Arg82<sub>c</sub> residues, whereas  
114 the triphosphate region is coordinated by another five Arg82<sub>c</sub> residues, with Tyr79<sub>8</sub> and Asn76<sub>8</sub>  
115 providing asymmetric coordination contacts. The presence of a nucleotide inside the c-ring is  
116 surprising, given the recent reports of phospholipids inside the c-rings in mammals<sup>5,6</sup> and  
117 ciliates<sup>9</sup>, indicating that a range of different ligands can provide structural scaffolding.

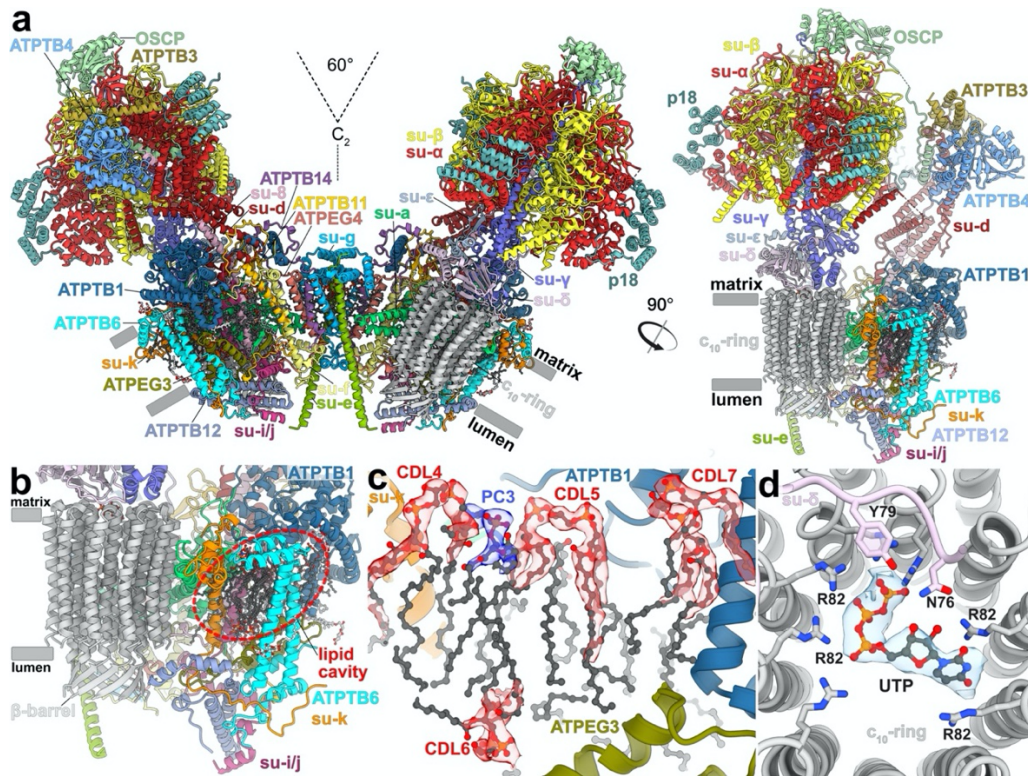

118

119 **Fig. 1: The *T. brucei* ATP synthase structure with lipids and ligands.**

120 **a**, Front and side views of the composite model with both monomers in rotational state 1. The  
 121 two F<sub>1</sub>/c<sub>10</sub>-ring complexes, each augmented by three copies of the phylum-specific p18 subunit,  
 122 are tied together at a 60°-angle. The membrane-bound F<sub>0</sub> region displays a unique architecture  
 123 and is composed of both conserved and phylum-specific subunits. **b**, Side view of the F<sub>0</sub> region  
 124 showing the luminal interaction of the ten-stranded β-barrel of the c-ring (grey) with ATPTB12  
 125 (pale blue). The lipid-filled peripheral F<sub>0</sub> cavity is indicated. **c**, Close-up view of the bound  
 126 lipids within the peripheral F<sub>0</sub> cavity with cryo-EM density shown. **d**, Top view into the  
 127 decameric c-ring with a bound pyrimidine ribonucleoside triphosphate, assigned as UTP. Map  
 128 density shown in transparent blue, interacting residues shown.

129

130 **Fig. 2: Identification of conserved F<sub>0</sub> subunits.**

131 **a**, Top view of the membrane region with *T. brucei* subunits (colored) overlaid with  
 132 *S. cerevisiae* structure (gray transparent). Close structural superposition and matching topology  
 133 allowed the assignment of conserved subunits based on matching topology and location.  
 134 **b**, Superposition of subunits-e and -g with their *S. cerevisiae* counterparts (PDB 6B2Z)  
 135 confirms their identity.

## 136 **Peripheral stalk flexibility and distinct rotational states**

137 The trypanosomal peripheral stalk displays a markedly different architecture compared to its  
138 yeast and mammalian counterparts. In the opisthokont complexes, the peripheral stalk is  
139 organized around the long *bH2*, which extends from the membrane ~15 nm into the matrix and  
140 attaches to OSCP at the top of  $F_1$ <sup>5,7</sup>. By contrast, *T. brucei* lacks the canonical *bH2* and instead,  
141 helices 5-7 of divergent subunit-*d* and the C-terminal helix of extended subunit-8 bind to a C-  
142 terminal extension of OSCP at the apical part of the peripheral stalk (Fig. 3a). The interaction  
143 between OSCP and subunit-*d* and -8 is stabilized by soluble ATPTB3 and ATPTB4. The  
144 peripheral stalk is rooted to the membrane subcomplex by a transmembrane helix of subunit-  
145 8, wrapped on the matrix side by helices 8-11 of subunit-*d*. Apart from the canonical contacts  
146 at the top of  $F_1$ , the peripheral stalk is attached to the  $F_1$  via a euglenozoa-specific C-terminal  
147 extension of OSCP, which contains a disordered linker and a terminal helix hairpin extending  
148 between the  $F_1$ -bound p18 and subunits -*d* and -8 of the peripheral stalk (Fig. 3a,  
149 Supplementary Videos 2,3). Another interaction of  $F_1$  with the peripheral stalk occurs between  
150 the stacked C-terminal helices of subunit- $\beta$  and -*d* (Fig. 3b), the former of which structurally  
151 belongs to  $F_1$  and is connected to the peripheral stalk via a flexible linker.

152 To assess whether the unusual peripheral stalk architecture influences the rotary mechanism,  
153 we analysed 10 classes representing different rotational states. The three main states (1-3) result  
154 from ~120° rotation of the central stalk subunit- $\gamma$ , and we identified five (1a-1e), four (2a-2d)  
155 and one (3) classes of the respective main states. The rotor positions of the rotational states 1a,  
156 2a and 3 are related by steps of 117°, 136° and 107°, respectively. Throughout all the identified  
157 substeps of the rotational state 1 (classes 1a to 1e) the rotor turns by ~33°, which corresponds  
158 approximately to the advancement by one subunit-*c* of the  $c_{10}$ -ring. While rotating along with  
159 the rotor, the  $F_1$  headpiece lags behind, advancing by only ~13°. During the following transition  
160 from 1e to 2a, the rotor advances by ~84°, whereas the  $F_1$  headpiece rotates ~22° in the opposite  
161 direction (Fig. 3c,d). This generates a counter-directional torque between the two motors,  
162 which is consistent with a power-stroke mechanism. Albeit with small differences in step size,  
163 this mechanism is consistent with a previous observation in the *Polytomella* ATP synthase<sup>8</sup>.  
164 However, due to its large, rigid peripheral stalk, the *Polytomella* ATP synthase mainly displays  
165 rotational substeps, whereas the *Trypanosoma*  $F_1$  also displays a tilting motion of ~8° revealed  
166 by rotary states 1 and 2 (Fig. 3e, Supplementary Video 2). The previously reported hinge  
167 motion between the N- and C-terminal domains of OSCP<sup>8</sup> is not found in our structure, instead,  
168 the conformational changes of the  $F_1/c_{10}$ -ring subcomplex are accommodated by a 5° bending  
169 of the apical part of the peripheral stalk. (Fig. 3e, Supplementary Videos 2,3). Together, the  
170 structural data indicate that the divergent peripheral stalk attachment confers greater  
171 conformational flexibility to the *T. brucei* ATP synthase.

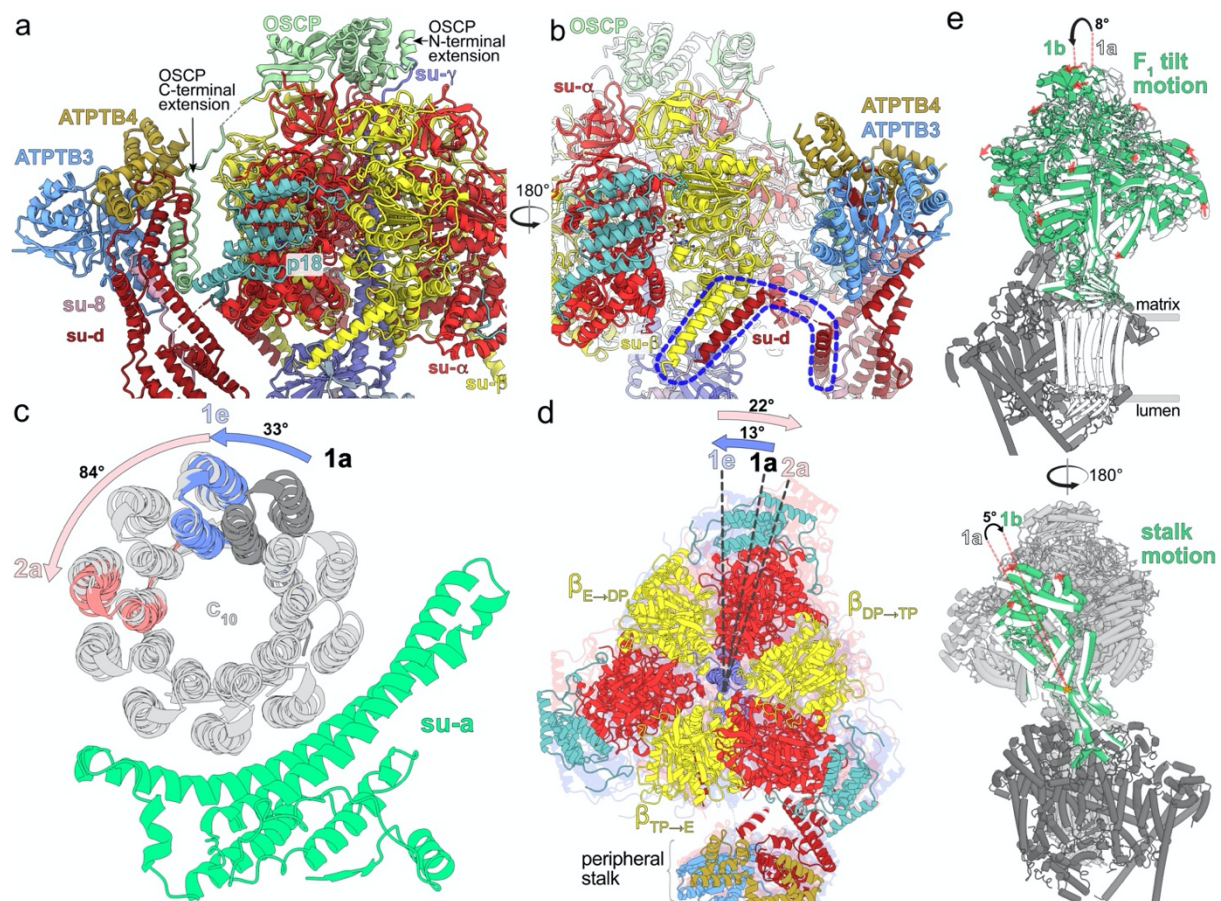

172

173 **Fig. 3: A divergent peripheral stalk allows high flexibility during rotary catalysis.** **a**, N-  
 174 terminal OSCP extension provides a permanent central stalk attachment, while the C-terminal  
 175 extension provides a phylum-specific attachment to the divergent peripheral stalk. **b**, The C-  
 176 terminal helices of subunits  $-\beta$  and  $-d$  provide a permanent  $F_1$  attachment. **c**, Substeps of the  $c$ -  
 177 ring during transition from rotational state 1 to 2. **d**,  $F_1$  motion accommodating steps shown in  
 178 (c). After advancing along with the rotor to state 1e, the  $F_1$  rotates in the opposite direction  
 179 when transitioning to state 2a. **e**, Tilting motion of  $F_1$  and accommodating bending of the  
 180 peripheral stalk.

181

### 182 Luminal proton half-channel is insulated by a lipid and contains ordered water molecules

183 The mechanism of proton translocation involves sequential protonation of E102 of subunits- $c$ ,  
 184 rotation of the  $c_{10}$ -ring with neutralized E102c exposed to the phospholipid bilayer, and release  
 185 of protons on the other side of the membrane. The sites of proton binding and release are  
 186 separated by the conserved R146 contributed by the horizontal helix H5 of subunit- $a$  and are  
 187 accessible from the cristae lumen and mitochondrial matrix by aqueous half channels (Fig. 4a).  
 188 Together, R146 and the adjacent N209 coordinate a pair of water molecules in between helices  
 189 H5 and H6 (Fig. 4b). A similar coordination has been observed in the *Polytomella* ATP  
 190 synthase<sup>8</sup>. The coordination of water likely restricts the R146 to rotamers that extend towards  
 191 the  $c$ -ring, with which it is thought to interact.

192 In our structure, the luminal half-channel is filled with a network of resolved water densities,  
 193 ending in a chain of five ordered water molecules (W1-W5; Fig. 4c,d,e). The presence of

194 ordered water molecules in the aqueous channel is consistent with a Grotthuss-type mechanism  
 195 for proton transfer, which would not require long-distance diffusion of water molecules<sup>5</sup>.  
 196 However, because some distances between the observed water molecules are too large for  
 197 direct hydrogen bonding, proton transfer may involve both coordinated and disordered water  
 198 molecules. The distance of 7 Å between the last resolved water (W1) and D202<sub>a</sub>, the conserved  
 199 residue that is thought to transfer protons to the *c*-ring, is too long for direct proton transfer.  
 200 Instead, it may occur via the adjacent H155<sub>a</sub>. Therefore, our structure resolves individual  
 201 elements participating in proton transport (Fig. 4d,e).

202 The luminal proton half-channel in the mammalian<sup>5,6</sup> and apicomplexan<sup>11</sup> ATP synthase is  
 203 lined by the transmembrane part of *b*H2, which is absent in *T. brucei*. Instead, the position of  
 204 *b*H2 is occupied by a fully ordered phosphatidylcholine in our structure (PC1; Fig. 4a,c).  
 205 Therefore, a bound lipid replaces a proteinaceous element in the proton path.

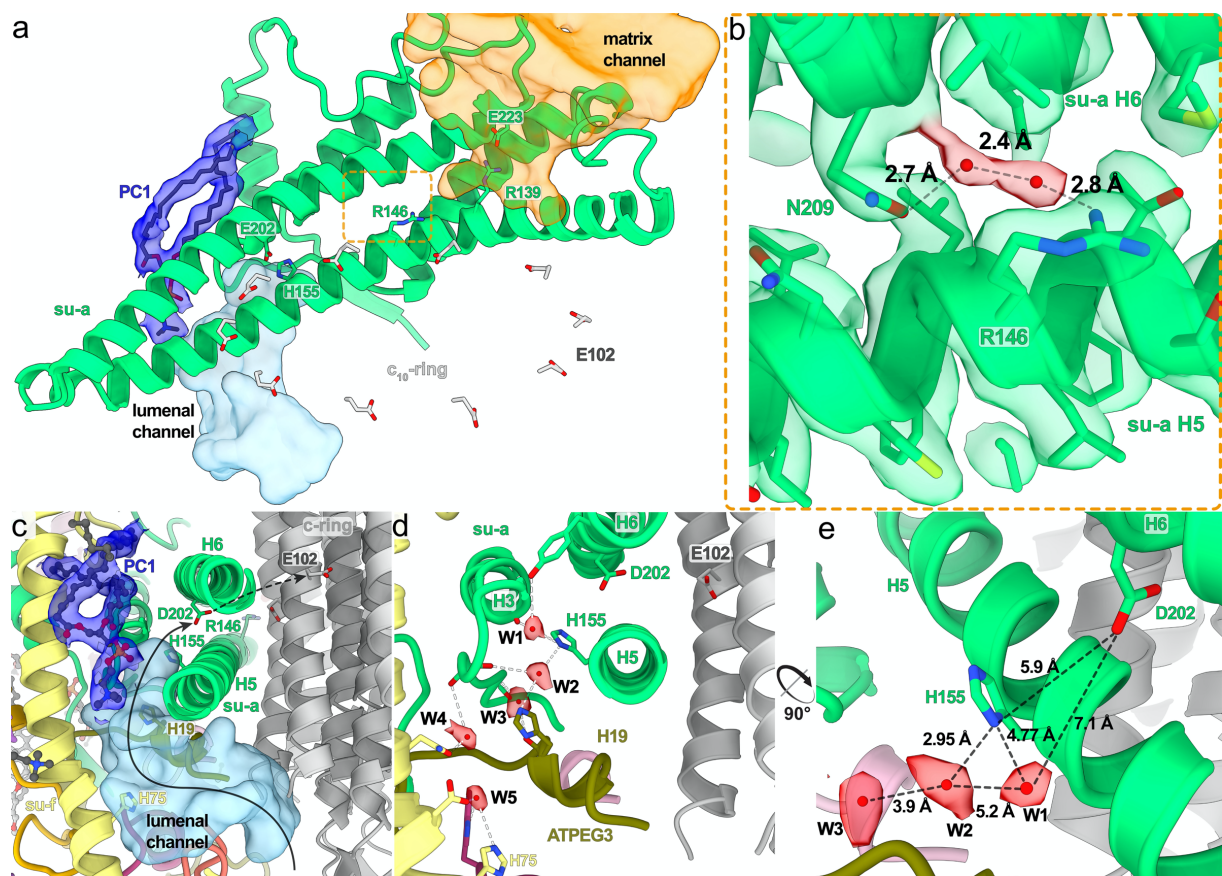

206  
 207 **Fig. 4: The luminal half-channel contains ordered water molecules and is confined by an**  
 208 **F<sub>o</sub>-bound lipid.** **a**, Subunit-*a* (green) with the matrix (orange) and luminal (light blue)  
 209 channels, and an ordered phosphatidylcholine (PC1; blue). E102 of the *c*<sub>10</sub>-ring shown in grey.  
 210 **b**, Close-up view of the highly conserved R146<sub>a</sub> and N209<sub>a</sub>, which coordinate two water  
 211 molecules between helices H5-6<sub>a</sub>. **c**, Sideview of the luminal channel with proton pathway  
 212 (light blue) and confining phosphatidylcholine (blue). **d**, Chain of ordered water molecules in  
 213 the luminal channel. Distances between the W1-W5 are 5.2, 3.9, 7.3 and 4.8 Å, respectively.  
 214 **e**, The ordered waters extend to H155<sub>a</sub>, which likely mediates the transfer of protons to D202<sub>a</sub>.

215  
 216

## 217 **Subunit-g facilitates assembly of different ATP synthase oligomers**

218 Despite sharing a set of conserved F<sub>o</sub> subunits, the *T. brucei* ATP synthase dimer displays a  
219 markedly different dimer architecture compared to all the previously determined structures.  
220 First, its interface of 3,600 Å<sup>2</sup> is smaller than that of the *E. gracilis* type-IV (10,000 Å<sup>2</sup>) and  
221 the *T. thermophila* type-III ATP synthases (16,000 Å<sup>2</sup>). Second, unlike mammalian and fungal  
222 ATP synthase, in which the peripheral stalks extend in the plane defined by the two rotary axes,  
223 in our structure the monomers are rotated such that the peripheral stalks are offset laterally on  
224 the opposite sides of the plane. Due to the rotated monomers, this architecture is associated  
225 with a specific dimerization interface, where two subunit-g copies interact homotypically on  
226 the C<sub>2</sub> symmetry axis (Fig. 5a, Supplementary Video 1). Both copies of H1-2<sub>g</sub> extend  
227 horizontally along the matrix side of the membrane, clamping against each other (Fig. 5c,e).  
228 This facilitates formation of contacts between an associated transmembrane helix of subunit-e  
229 with the neighbouring monomer via subunit-a' in the membrane, and -f' in the lumen, thereby  
230 further contributing to the interface (Fig. 5b). Thus, the ATP synthase dimer is assembled via  
231 the subunit-e/g module. The C-terminal part of the subunit-e helix extends into the lumen,  
232 towards the ten-stranded β-barrel of the c-ring (Supplementary Fig. 6a). The terminal 23  
233 residues are disordered with poorly resolved density connecting to the detergent plug of the c-  
234 ring β-barrel (Supplementary Fig. 6b). This resembles the luminal C-terminus of subunit-e in  
235 the bovine structure<sup>5</sup>, indicating a conserved interaction with the c-ring.

236 The e/g module is held together by four bound cardiolipins in the matrix leaflet, anchoring it  
237 to the remaining F<sub>o</sub> region (Fig. 5c). The head groups of the lipids are coordinated by polar and  
238 charged residues with their acyl chains filling a central cavity in the membrane region at the  
239 dimer interface (Fig 5c, Supplementary Fig. 4f). Cardiolipin binding has previously been  
240 reported to be obligatory for dimerization in secondary transporters<sup>28</sup> and the depletion of  
241 cardiolipin synthase resulted in reduced levels of ATP synthase in the bloodstream  
242 trypanosomes<sup>14</sup>.

243 Interestingly, for yeasts, early blue native gel electrophoresis<sup>29</sup> and subtomogram averaging  
244 studies<sup>2</sup> suggested subunit-g as potentially dimer-mediating, however the e/g modules are  
245 located laterally opposed on either side of the dimer long axis, in the periphery of the complex,  
246 ~8.5 nm apart from each other. Because the e/g module does not interact directly within the  
247 yeast ATP synthase dimer, they have been proposed to serve as membrane bending elements,  
248 whereas the major dimer contacts are formed by subunit-a and -i/j<sup>7</sup>. In mammals, the e/g  
249 module occupies the same position as in yeasts, forming the interaction between two diagonal  
250 monomers in a tetramer<sup>5,6,30</sup>, as well as between parallel dimers<sup>31</sup>. The comparison with our  
251 structure shows that the overall organization of the intra-dimeric trypanosomal and inter-  
252 dimeric mammalian e/g module is structurally similar (Fig. 5d). Furthermore, kinetoplastid  
253 parasites and mammals share conserved GXXXG motifs in subunit-e<sup>32</sup> and -g (Supplementary  
254 Fig. 8), which allow close interaction of their transmembrane helices (Fig. 5e), providing  
255 further evidence for subunit homology. However, while the mammalian ATP synthase dimers  
256 are arranged perpendicularly to the long axis of their rows along the edge of cristae<sup>33</sup>, the  
257 *T. brucei* dimers on the rims of discoidal cristae are inclined ~45° to the row axis<sup>15</sup>. Therefore,  
258 the e/g module occupies equivalent positions in the rows of both evolutionary distant groups  
259 (Fig. 5f and reference 31).



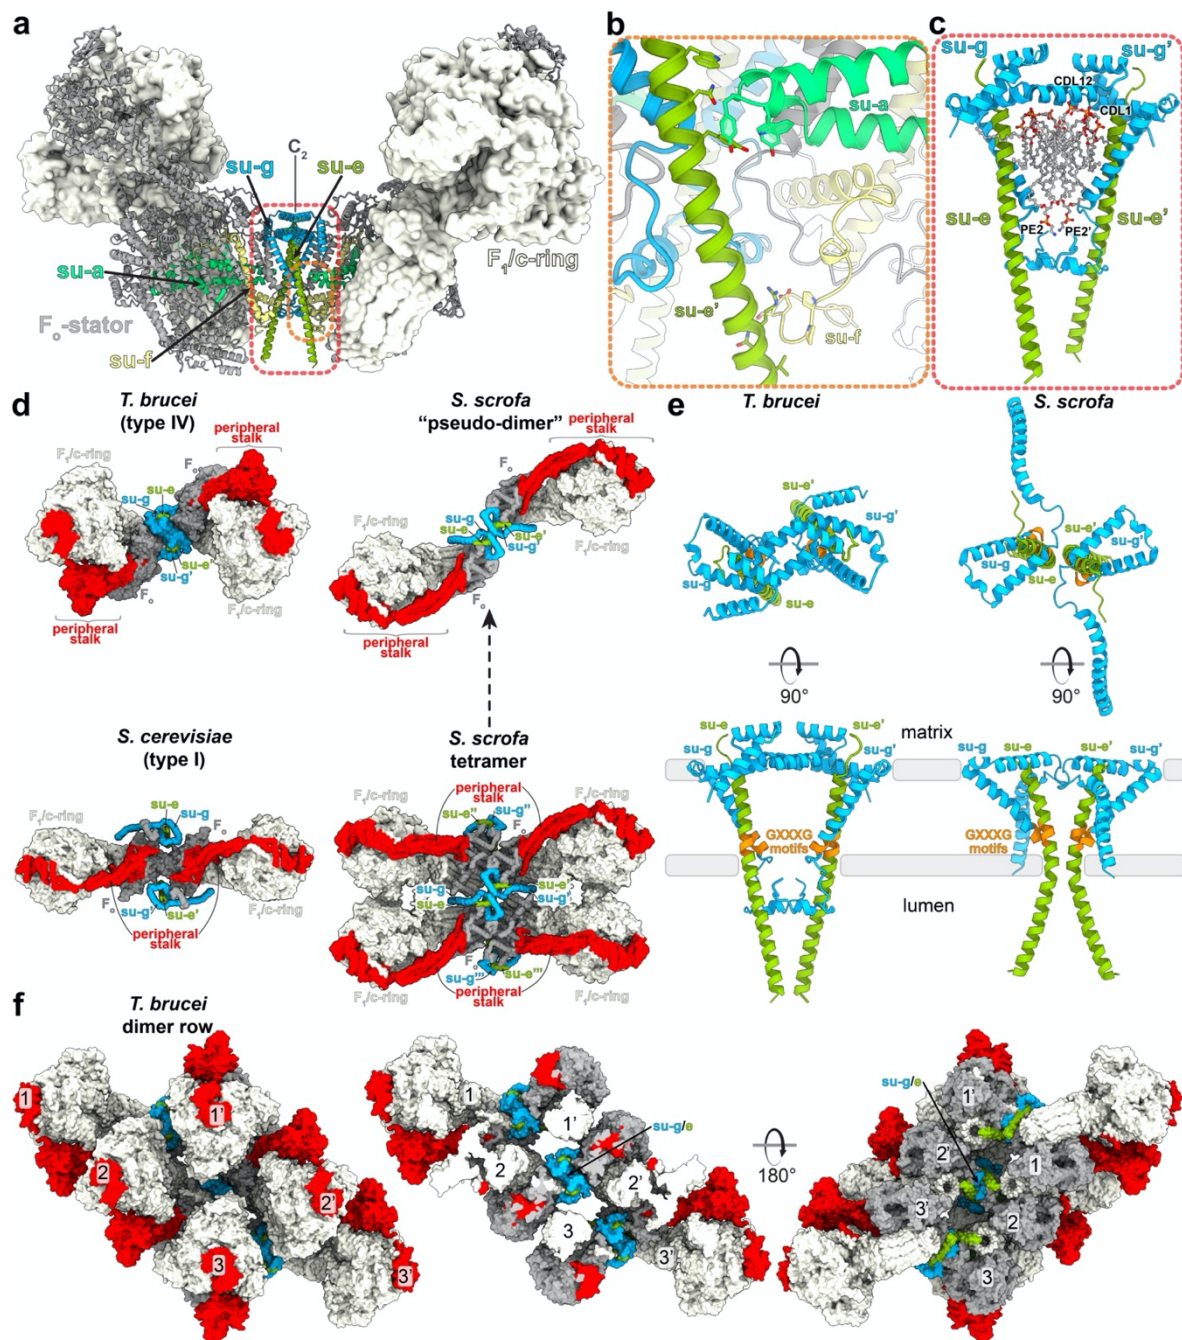

260

261 **Fig. 5: The homotypic dimerization motif of subunit-g generates a conserved**  
 262 **oligomerisation module.** **a**, Side view with dimerising subunits colored. **b,c**, The dimer  
 263 interface is constituted by (b) subunit-e' contacting subunit-a in the membrane and subunit-f  
 264 in the lumen, (c) subunits e and g from both monomers forming a subcomplex with bound  
 265 lipids. **d**, Subunit-g and -e form a dimerization motif in the trypanosomal (type-IV) ATP  
 266 synthase dimer (this study), the same structural element forms the oligomerisation motif in the  
 267 porcine ATP synthase tetramer. The structural similarity of the pseudo-dimer in the porcine  
 268 structure with the trypanosomal dimer suggests that that type I and IV ATP synthase dimers  
 269 have evolved through divergence from a common ancestor. **e**, The dimeric subunit-e/g  
 270 structures are conserved in pig (PDB 6ZNA) and *T. brucei* (this work) and contain a conserved  
 271 GXXXG motif (orange) mediating interaction of transmembrane helices. **f**, Models of ATP  
 272 synthase dimers fitted into subtomogram averages of short oligomers<sup>15</sup> (EMD-3560).

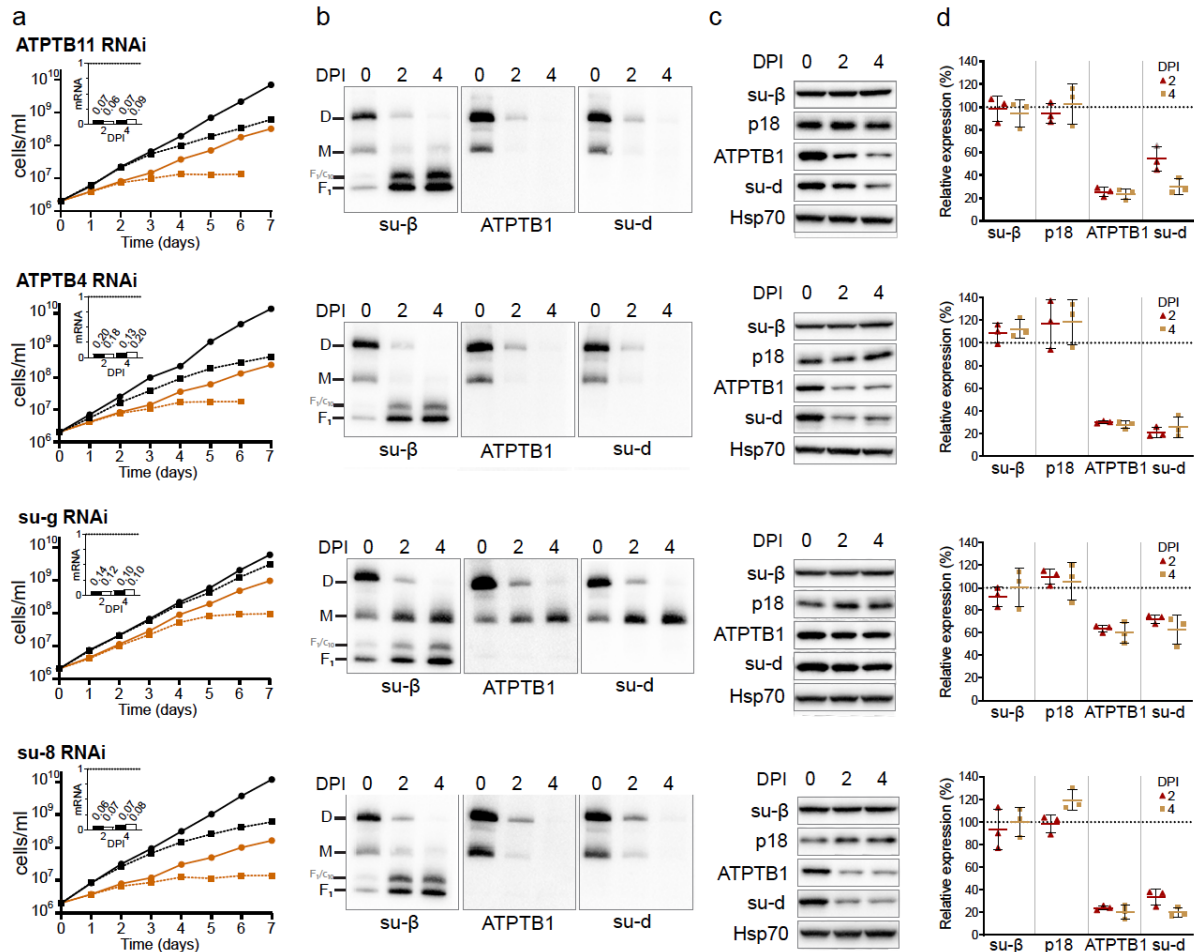

273

274

275

276

277

278

279

280

281

282

283

**Fig. 6: RNAi knockdown of subunit-g results in monomerization of ATP synthase. a,** Growth curves of non-induced (solid lines) and tetracycline-induced (dashed lines) RNAi cell lines grown in the presence (black) or absence (brown) of glucose. The insets show relative levels of the respective target mRNA at indicated days post-induction (DPI) normalized to the levels of 18S rRNA (black bars) or  $\beta$ -tubulin (white bars). **b,** Immunoblots of mitochondrial lysates from indicated RNAi cell lines resolved by BN-PAGE probed with antibodies against indicated ATP synthase subunits. **c,** Representative immunoblots of whole cell lysates from indicated RNAi cell lines probed with indicated antibodies. **d,** Quantification of three replicates of immunoblots in (c). Values were normalized to the signal of loading marker Hsp70 and to non-induced cells. Plots show means with standard deviations (SD).

## 284 **Subunit-g retains the dimer but is not essential for the catalytic monomer**

285 To validate structural insights, we knocked down each individual F<sub>o</sub> subunit by inducible RNA  
286 interference (RNAi). All target mRNAs dropped to 5-20 % of their original levels after two  
287 and four days of induction (Fig. 6a and Supplementary Fig. 7a, insets). Western blot analysis  
288 of whole-cell lysates resolved by denaturing electrophoresis revealed decreased levels of F<sub>o</sub>  
289 subunits ATPB1 and -d suggesting that integrity of F<sub>o</sub> moiety depends on the presence of other  
290 F<sub>o</sub> subunits. Immunoblotting of mitochondrial complexes resolved by blue native  
291 polyacrylamide gel electrophoresis (BN-PAGE) with antibodies against F<sub>1</sub> and F<sub>o</sub> subunits  
292 revealed a strong decrease or nearly complete loss of dimeric and monomeric forms of ATP  
293 synthases four days after induction of RNAi of most subunits (*e, f, i/j, k, 8, ATPTB3, ATPTB4,*  
294 *ATPTB6, ATPTB11, ATPTB12, ATPTB14, ATPEG3 and ATPEG4*), documenting an  
295 increased instability of the enzyme or defects in its assembly. Simultaneous increase in F<sub>1</sub>-  
296 ATPase levels demonstrated that the catalytic moiety remains intact after the disruption of the  
297 peripheral stalk or the membrane subcomplex (Fig. 6b,c,d and Supplementary Fig. 7b,c,d).

298 In contrast to the other targeted F<sub>o</sub> subunits, the downregulation of subunit-g with RNAi  
299 resulted in a specific loss of dimeric complexes with concomitant accumulation of monomers  
300 (Fig. 6b), indicating that it is required for dimerization, but not for the assembly and stability  
301 of the monomeric F<sub>1</sub>F<sub>o</sub> ATP synthase units. Transmission electron microscopy of thin cell  
302 sections revealed that the ATP synthase monomerization in the subunit-g<sup>RNAi</sup> cell line had the  
303 same effect on mitochondrial ultrastructure as nearly complete loss of monomers and dimers  
304 upon knockdown of subunit-8. Both cell lines exhibited decreased cristae counts and aberrant  
305 cristae morphology (Fig. 7a,b), including the appearance of round shapes reminiscent of  
306 structures detected upon deletion of subunit-g or -e in *Saccharomyces cerevisiae*<sup>1</sup>. These results  
307 indicate that monomerization prevents the trypanosomal ATP synthase from assembling into  
308 short helical rows on the rims of the discoidal cristae<sup>15</sup>, as has been reported for impaired  
309 oligomerisation in counterparts from other eukaryotes<sup>2,34</sup>.

310 Despite the altered mitochondrial ultrastructure, the subunit-g<sup>RNAi</sup> cells showed only a very  
311 mild growth phenotype, in contrast to all other RNAi cell lines that exhibited steadily slowed  
312 growth from day 3 to 4 after the RNAi induction (Fig. 6a, Supplementary Fig. 7a). This is  
313 consistent with the growth defects observed after the ablation of F<sub>o</sub> subunit ATPTB1<sup>19</sup> and F<sub>1</sub>  
314 subunits- $\alpha$  and p18<sup>12</sup>. Thus, the monomerization of ATP synthase upon subunit-g ablation had  
315 only a negligible effect on the fitness of trypanosomes cultured in glucose-rich media, in which  
316 ATP production by substrate level phosphorylation partially compensates for compromised  
317 oxidative phosphorylation<sup>35</sup>.

318 Measurement of oligomycin-sensitive ATP-dependent mitochondrial membrane polarization  
319 by safranin O assay in permeabilized cells showed that the proton pumping activity of the ATP  
320 synthase in the induced subunit-g<sup>RNAi</sup> cells is sufficient to generate mitochondrial membrane  
321 potential, demonstrating that the monomerized enzyme is catalytically functional. By contrast,  
322 RNAi downregulation of subunit-8, ATPTB4 and ATPTB11, and ATPTB1 resulted in a strong  
323 decline of the mitochondrial membrane polarization capacity, consistent with the loss of both  
324 monomeric and dimeric ATP synthase forms (Fig. 7c). Accordingly, knockdown of the same  
325 subunits resulted in inability to produce ATP by oxidative phosphorylation (Fig. 7d). However,  
326 upon subunit-g ablation the ATP production was affected only partially, confirming that the

327 monomerized ATP synthase remains catalytically active. The ~50 % drop of ATP production  
 328 in the subunit- $g^{RNAi}$  cells can be attributed to the decreased oxidative phosphorylation  
 329 efficiency due to the impaired cristae morphology. Indeed, when cells were cultured in the  
 330 absence of glucose enforcing the need for oxidative phosphorylation, knockdown of subunit- $g$   
 331 results in a growth arrest, albeit one to two days later than knockdown of all other tested  
 332 subunits (Fig. 6a). The data show that dimerization is critical when oxidative phosphorylation  
 333 is the predominant source of ATP.

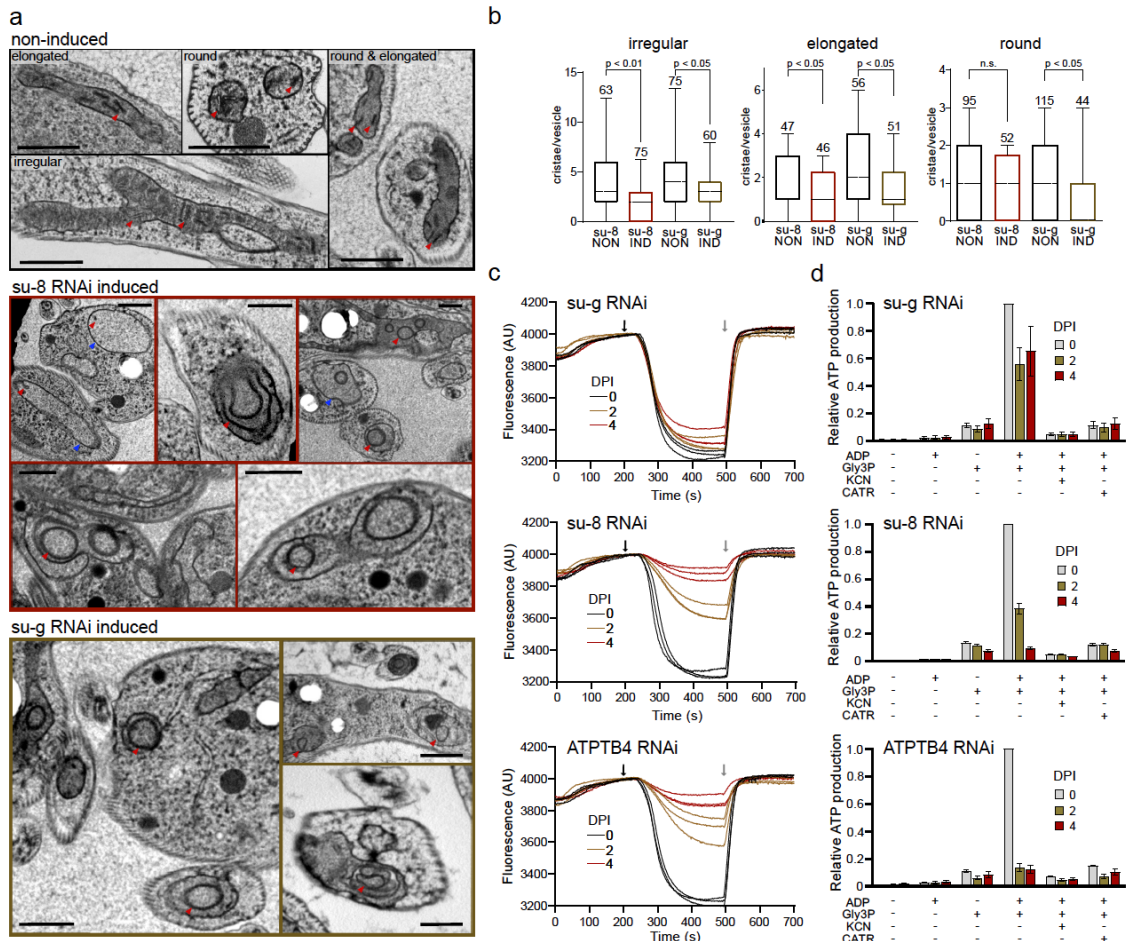

334  
 335 **Fig. 7: Monomerization of ATP synthase by subunit- $g$  knockdown results in aberrant**  
 336 **mitochondrial ultrastructure but does not abolish catalytic activity.** **a**, Transmission  
 337 electron micrographs of sections of non-induced or 4 days induced RNAi cell lines.  
 338 Mitochondrial membranes and cristae are marked with blue and red arrowheads, respectively.  
 339 Top panel shows examples of irregular, elongated and round cross-sections of mitochondria  
 340 quantified in (b). **b**, Cristae numbers per vesicle from indicated induced (IND) or non-induced  
 341 (NON) cell lines counted separately in irregular, elongated and round mitochondrial cross-  
 342 section. Boxes and whiskers show 25<sup>th</sup> to 75<sup>th</sup> and 5<sup>th</sup> to 95<sup>th</sup> percentiles, respectively. The  
 343 numbers of analysed cross-sections are indicated for each data point. **c**, Safranin O  
 344 measurement of ability to generate mitochondrial membrane potential in non-induced or  
 345 tetracycline-induced RNAi cell lines 2 and 4 DPI. Black and gray arrow indicate addition of  
 346 ATP and oligomycin, respectively. **d**, ATP production in permeabilized non-induced or  
 347 tetracycline-induced RNAi cells 2 and 4 DPI in the presence of indicated substrates and  
 348 inhibitors. Error bars represent SD of four replicates.

## 349 Discussion

350 Our structure of the mitochondrial ATP synthase dimer from the mammalian parasite *T. brucei*  
351 offers new insight into the mechanism of membrane shaping, catalytic rotation, and proton  
352 transfer. Considering that trypanosomes belong to an evolutionarily divergent group of  
353 Kinetoplastida, the ATP synthase dimer has several interesting features that differ from other  
354 dimer structures. The subunit-*b* found in bacterial and other mitochondrial F-type ATP  
355 synthases appears to be highly reduced to a single transmembrane helix *bH1* represented by a  
356 likely homolog ATPTB14. The long *bH2*, which constitutes the central part of the peripheral  
357 stalk in other organisms, and is also involved in the composition of the luminal half proton  
358 channel, is completely absent in *T. brucei*. Interestingly, the position of *bH2* in the proton half  
359 channel is occupied by a fully ordered phosphatidylcholine molecule that replaces well-  
360 conserved proteinaceous element in the proton path. Lack of the canonical *bH2* also affects  
361 composition of the peripheral stalk in which the divergent subunit-*d* and subunit-*δ* binds  
362 directly to a C-terminal extension of OSCP, indicating a remodeled peripheral stalk  
363 architecture. The peripheral stalk contacts the F<sub>1</sub> headpiece at several positions conferring  
364 greater conformational flexibility to the ATP synthase.

365 Using the structural and functional data, we also identified a conserved structural element of  
366 the ATP synthase that is responsible for its multimerization. Particularly, subunit-*g* is required  
367 for the dimerization, but dispensable for the assembly of the F<sub>1</sub>F<sub>o</sub> monomers. Although the  
368 monomerized enzyme is catalytically competent, the inability to form dimers results in  
369 defective cristae structure, and consequently leads to compromised oxidative phosphorylation  
370 and cease of proliferation. The cristae-shaping properties of mitochondrial ATP synthase are  
371 critical for sufficient ATP production by oxidative phosphorylation, but not for other  
372 mitochondrial functions, as demonstrated by the lack of growth phenotype of subunit-*g*<sup>RNAi</sup>  
373 cells in the presence of glucose. Thus, trypanosomal subunit-*g* depletion strain represents an  
374 experimental tool to assess the roles of the enzyme's primary catalytic function and  
375 mitochondria-specific membrane-shaping activity, highlighting the importance of the latter for  
376 oxidative phosphorylation.

377 Based on our data and previously published structures, we propose an ancestral state with  
378 double rows of ATP synthase monomers connected by *e/g* modules longitudinally and by other  
379 F<sub>o</sub> subunits transversally. During the course of evolution, different pairs of adjacent ATP  
380 synthase monomer units formed stable dimers in individual lineages (Fig. 8). This gave rise to  
381 the highly divergent type-I and type-IV ATP synthase dimers with subunit-*e/g* modules serving  
382 as dimerization or oligomerization motives, respectively. Because trypanosomes belong to the  
383 deep-branching eukaryotic supergroup Discoba, the proposed arrangement might have been  
384 present in the last eukaryotic common ancestor. Although sequence similarity of subunit-*g* is  
385 low and restricted to the single transmembrane helix, we found homologs of subunit-*g* in  
386 addition to Opisthokonta and Discoba also in Archaeplastida and Amoebozoa, which represent  
387 other eukaryotic supergroups, thus supporting the ancestral role in oligomerization  
388 (Supplementary Fig. 8). Taken together, our analysis reveals that mitochondrial ATP synthases  
389 that display markedly diverged architecture share the ancestral structural module that promotes  
390 oligomerization.

391

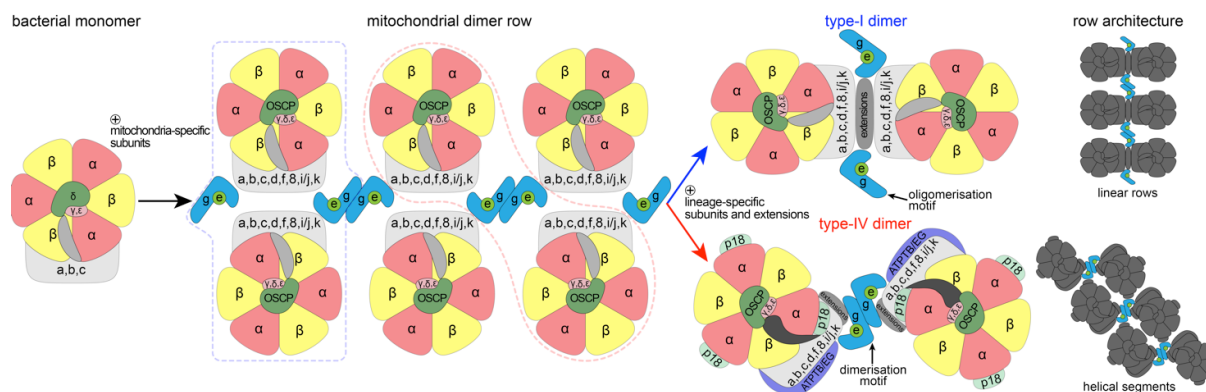

392

393 **Fig. 8: The subunit-*e/g* module is an ancestral oligomerization motif of ATP synthase.**  
 394 Schematic model of the evolution of type-I and IV ATP synthases. Mitochondrial ATP  
 395 synthases are derived from a monomeric complex of proteobacterial origin. In a mitochondrial  
 396 ancestor, acquisition of mitochondria-specific subunits, including the subunit-*e/g* module  
 397 resulted in the assembly of ATP synthase double rows, the structural basis for cristae  
 398 biogenesis. Through divergence, different ATP synthase dimer architectures evolved, with the  
 399 subunit-*e/g* module functioning as an oligomerization (type I) or dimerization (type IV) motif,  
 400 resulting in distinct row assemblies between mitochondrial lineages.

401

## 402 **Materials and Methods**

### 403 Cell culture and isolation of mitochondria

404 *T. brucei* procyclic strains were cultured in SDM-79 medium supplemented with 10% (v/v)  
 405 fetal bovine serum. For growth curves in no glucose conditions, cells were grown in SDM-80  
 406 medium with 10 % dialysed FBS. RNAi cell lines were grown in presence of 2.5  $\mu\text{g/ml}$   
 407 phleomycin and 1  $\mu\text{g/ml}$  puromycin. For ATP synthase purification, mitochondria were  
 408 isolated from the Lister strain 427. Typically,  $1.5 \times 10^{11}$  cells were harvested, washed in 20 mM  
 409 sodium phosphate buffer pH 7.9 with 150 mM NaCl and 20 mM glucose, resuspended in  
 410 hypotonic buffer 1 mM Tris-HCl pH 8.0, 1 mM EDTA, and disrupted by 10 strokes in 40 ml  
 411 Dounce homogenizer. The lysis was stopped by immediate addition of sucrose to 0.25 M.  
 412 Crude mitochondria were pelleted (15 min at 16,000 xg, 4°C), resuspended in 20 mM Tris-  
 413 HCl pH 8.0, 250 mM sucrose, 5 mM MgCl<sub>2</sub>, 0.3 mM CaCl<sub>2</sub> and treated with 5  $\mu\text{g/ml}$  DNase I.  
 414 After 60 min on ice, one volume of the STE buffer (20 mM Tris-HCl pH 8.0, 250 mM sucrose,  
 415 2 mM EDTA) was added and mitochondria were pelleted (15 min at 16000 xg, 4°C). The pellet  
 416 was resuspended in 60% (v/v) Percoll in STE and loaded on six linear 10-35% Percoll gradients  
 417 in STE in polycarbonate tubes for SW28 rotor (Beckman). Gradients were centrifuged for 1 h  
 418 at 24,000 rpm, 4°C. The middle phase containing mitochondrial vesicles (15-20 ml per tube)  
 419 was collected, washed twice in the STE buffer, and pellets were snap-frozen in liquid nitrogen  
 420 and stored at -80°C.

421

### 422 Plasmid construction and generation of RNAi cell lines

423 To downregulate ATP synthase subunits by RNAi, DNA fragments corresponding to  
 424 individual target sequences were amplified by PCR from Lister 427 strain genomic DNA using

425 forward and reverse primers extended with restriction sites *XhoI*&*KpnI* and *XbaI*&*BamHI*,  
426 respectively (Supplementary Table 3). Each fragment was inserted into the multiple cloning  
427 sites 1 and 2 of pAZ0055 vector, derived from pRP<sup>HYG-iSL</sup> (courtesy of Sam Alford) by  
428 replacement of hygromycin resistance gene with phleomycin resistance gene, with restriction  
429 enzymes *KpnI/BamHI* and *XhoI/XbaI*, respectively. Resulting constructs with tetracycline  
430 inducible T7 polymerase driven RNAi cassettes were linearized with *NotI* and transfected into  
431 a cell line derived from the Lister strain 427 by integration of the SmOx construct for  
432 expression of T7 polymerase and the tetracycline repressor<sup>36</sup> into the  $\beta$ -tubulin locus. RNAi  
433 was induced in selected semi-clonal populations by addition of 1  $\mu$ g/ml tetracycline and the  
434 downregulation of target mRNAs was verified by quantitative RT-PCR 2- and 4-days post  
435 induction. The total RNA isolated by RNeasy Mini Kit (Qiagen) was treated with 2  $\mu$ g of  
436 DNase I, and then reverse transcribed to cDNA with TaqMan Reverse Transcription kit  
437 (Applied Biosciences). qPCR reactions were set with Light Cycler 480 SYBR Green I Master  
438 mix (Roche), 2  $\mu$ l of cDNA and 0.3  $\mu$ M primers (Supplementary Table 3), and run on  
439 LightCycler 480 (Roche). Relative expression of target genes was calculated using  $-\Delta\Delta C_t$   
440 method with 18S rRNA or  $\beta$ -tubulin as endogenous reference genes and normalized to  
441 noninduced cells.

442

#### 443 Denaturing and blue native polyacrylamide electrophoresis and immunoblotting

444 Whole cell lysates for denaturing sodium dodecyl sulphate polyacrylamide electrophoresis  
445 (SDS-PAGE) were prepared from cells resuspended in PBS buffer (10 mM phosphate buffer,  
446 130 mM NaCl, pH 7.3) by addition of 3x Laemmli buffer (150 mM Tris pH 6.8, 300 mM 1,4-  
447 dithiothreitol, 6% (w/v) SDS, 30% (w/v) glycerol, 0.02% (w/v) bromophenol blue) to final  
448 concentration of  $1 \times 10^7$  cells in 30  $\mu$ l. The lysates were boiled at 97°C for 10 min and stored at  
449 -20°C. For immunoblotting, lysates from  $3 \times 10^6$  cells were separated on 4-20 % gradient Tris-  
450 glycine polyacrylamide gels (BioRad 4568094), electroblotted onto a PVDF membrane (Pierce  
451 88518), and probed with respective antibodies (Supplementary Table 4). Membranes were  
452 incubated with the Clarity Western ECL substrate (BioRad 1705060EM) and  
453 chemiluminescence was detected on a ChemiDoc instrument (BioRad). Band intensities were  
454 quantified densitometrically using the ImageLab software. The levels of individual subunits  
455 were normalized to the signal of mtHsp70.

456 Blue native PAGE (BN-PAGE) was performed as described earlier<sup>12</sup> with following  
457 modifications. Crude mitochondrial vesicles from  $2 \times 10^8$  cells were resuspended in 1 M  $\epsilon$ -  
458 aminocaproic acid (ACA) and solubilized with 2% (w/v) dodecylmaltoside (DDM) for 1 h on  
459 ice. Lysates were cleared at 16,000 g for 30 min at 4°C and their protein concentration was  
460 estimated using bicinchoninic acid assay and diluted to 0.25  $\mu$ g/  $\mu$ l. 16  $\mu$ l of each sample was  
461 mixed with 2  $\mu$ l of 50 % (w/v) glycerol and 1.5  $\mu$ l of loading dye (500 mM ACA, 5% (w/v)  
462 Coomassie Brilliant Blue G-250) and resolved on Native PAGE 3-12% Bis-Tris gels  
463 (Invitrogen). After the electrophoresis (3 h, 140 V, 4°C), proteins were transferred by  
464 electroblotting onto a PVDF membrane (2 h, 100 V, 4°C, stirring), followed by  
465 immunodetection with an appropriate antibody (Supplementary Table 4).

466

467

#### 468 Mitochondrial membrane potential measurement

469 Mitochondrial membrane potential was determined fluorometrically employing safranin O dye  
470 (Sigma S2255) in permeabilized cells. For each sample,  $2 \times 10^7$  cells were harvested and washed  
471 with ANT buffer (8 mM KCl, 110 mM K-gluconate, 10 mM NaCl, 10 mM free-acid Hepes,  
472 10 mM  $K_2HPO_4$ , 0.015 mM EGTA potassium salt, 10 mM mannitol, 0.5 mg/ml fatty acid-free  
473 BSA, 1.5 mM  $MgCl_2$ , pH 7.25). The cells were permeabilized by 4  $\mu$ M digitonin in 2 ml of  
474 ANT buffer containing 5  $\mu$ M safranin O. Fluorescence was recorded for 700 s in a Hitachi F-  
475 7100 spectrofluorimeter (Hitachi High Technologies) at a 5-Hz acquisition rate, using 495 nm  
476 and 585 nm excitation and emission wavelengths, respectively. 1 mM ATP (PanReac  
477 AppliChem A1348,0025) and 10  $\mu$ g/ml oligomycin (Sigma O4876) were added after 200 s and  
478 500 s, respectively. Final addition of the uncoupler SF 6847 (250 nM; Enzo Life Sciences  
479 BML-EI215-0050) served as a control for maximal depolarization. All experiments were  
480 performed at room temperature and constant stirring.

481

#### 482 ATP production assay

483 ATP production in digitonin-isolated mitochondria was performed as described previously<sup>37</sup>.  
484 Briefly,  $1 \times 10^8$  cells per time point were lysed in SoTE buffer (600 mM sorbitol, 2 mM EDTA,  
485 20 mM Tris-HCl, pH 7.75) containing 0.015% (w/v) digitonin for 5 min on ice. After  
486 centrifugation (3 min, 4,000 g, 4°C), the soluble cytosolic fraction was discarded and the  
487 organellar pellet was resuspended in 75  $\mu$ l of ATP production assay buffer (600 mM sorbitol,  
488 10 mM  $MgSO_4$ , 15 mM potassium phosphate buffer pH 7.4, 20 mM Tris-HCl pH 7.4, 2.5  
489 mg/ml fatty acid-free BSA). ATP production was induced by addition of 20 mM DL-glycerol  
490 phosphate (sodium salt) and 67  $\mu$ M ADP. Control samples were preincubated with the  
491 inhibitors potassium cyanide (1 mM) and carboxyatractyloside (6.5  $\mu$ M) for 10 min at room  
492 temperature. After 30 min at room temperature, the reaction was stopped by addition of 1.5  $\mu$ l  
493 of 70% perchloric acid. The concentration of ATP was estimated using the Roche ATP  
494 Bioluminescence Assay Kit HS II in a Tecan Spark plate reader. The luminescence values of  
495 the RNAi induced samples were normalized to that of the corresponding noninduced sample.

496

#### 497 Thin sectioning and transmission electron microscopy

498 The samples were centrifuged and pellet was transferred to the specimen carriers which were  
499 completed with 20% BSA and immediately frozen using high pressure freezer Leica EM ICE  
500 (Leica Microsystems). Freeze substitution was performed in the presence of 2% osmium  
501 tetroxide diluted in 100% acetone at -90°C. After 96 h, specimens were warmed to -20°C at a  
502 slope 5 °C/h. After next 24 h, the temperature was increased to 3°C (3°C/h). In room  
503 temperature, samples were washed in acetone and infiltrated with 25%, 50%, 75%  
504 acetone/resin EMBED 812 (EMS) mixture 1 h at each step. Finally, samples were infiltrated in  
505 100% resin and polymerized at 60°C for 48h. Ultrathin sections (70 nm) were cut using  
506 diamond knife, placed on copper grids and stained with uranyl acetate and lead citrate. TEM  
507 micrographs were taken with Mega View III camera (SIS) using a JEOL 1010 TEM operating  
508 at an accelerating voltage of 80 kV.



509

#### 510 Purification of *T. brucei* ATP synthase dimers

511 Mitochondria from  $3 \times 10^{11}$  cells were lysed by 1 % (w/v) DDM in 60 ml of 20 mM Bis-tris  
512 propane pH 8.0 with 10 % glycerol and EDTA-free Complete protease inhibitors (Roche) for  
513 20 min at 4°C. The lysate was cleared by centrifugation at 30,000g for 20 min at 4°C and  
514 adjusted to pH 6.8 by drop-wise addition of 1 M 3-(N-morpholino) propanesulfonic acid pH  
515 5.9. Recombinant TbIF<sub>1</sub> without dimerization region, whose affinity to F<sub>1</sub>-ATPase was  
516 increased by N-terminal truncation and substitution of tyrosine 36 with tryptophan<sup>20</sup>, with a C-  
517 terminal glutathione S-transferase (GST) tag (TbIF<sub>1</sub>(9-64)-Y36W-GST) was added in  
518 approximately 10-fold molar excess over the estimated content of ATP synthase. Binding of  
519 TbIF<sub>1</sub> was facilitated by addition of neutralized 2 mM ATP with 4 mM magnesium sulphate.  
520 After 5 min, sodium chloride was added to 100 mM, the lysate was filtered through a 0.2 µm  
521 syringe filter and immediately loaded on 5 ml GSTrap HP column (Cytiva) equilibrated in 20  
522 mM Bis-Tris-Propane pH 6.8 binding buffer containing 0.1 % (w/v) glyco-diosgenin (GDN;  
523 Avanti Polar Lipids), 10 % (v/v) glycerol, 100 mM sodium chloride, 1 mM tris(2-  
524 carboxyethyl)phosphine (TCEP), 1 mM ATP, 2 mM magnesium sulphate, 15 µg/ml  
525 cardiolipin, 50 µg/ml 1-palmitoyl-2-oleoyl-sn-glycero-3-phosphocholine (POPC), 25 µg/ml 1-  
526 palmitoyl-2-oleoyl-sn-glycero-3-phosphoethanolamine (POPE) and 10 µg/ml 1-palmitoyl-2-  
527 oleoyl-sn-glycero-3-[phospho-rac-(1-glycerol)] (POPG). All phospholipids were purchased  
528 from Avanti Polar Lipids (catalog numbers 840012C, 850457C, 850757C and 840757,  
529 respectively). ATP synthase was eluted with a gradient of 20 mM reduced glutathione in Tris  
530 pH 8.0 buffer containing the same components as the binding buffer. Fractions containing ATP  
531 synthase were pooled and concentrated to 150 µl on Vivaspin centrifugal concentrator with 30  
532 kDa molecular weight cut-off. The sample was fractionated by size exclusion chromatography  
533 on a Superose 6 Increase 3.2/300 GL column (Cytiva) equilibrated in a buffer containing 20  
534 mM Tris pH 8.0, 100 mM sodium chloride, 2 mM magnesium chloride, 0.1 % (w/v) GDN,  
535 3.75 µg/ml cardiolipin, 12.5 µg/ml POPC, 6.25 µg/ml POPE and 2.5 µg/ml POPG at 0.03  
536 ml/min. Fractions corresponding to ATP synthase were pooled, supplemented with 0.05%  
537 (w/v) DDM that we and others experimentally found to better preserve dimer assemblies in  
538 cryo-EM<sup>38</sup>, and concentrated to 50 µl.

539

#### 540 Preparation of cryo-EM grids and data collection

541 Samples were vitrified on glow-discharged Quantifoil R1.2/1.3 Au 300-mesh grids after  
542 blotting for 3 s by plunging into liquid ethane using a Vitrobot Mark IV. 5,199 movies were  
543 collected using EPU 1.9 on a Titan Krios (ThermoFisher Scientific) operated at 300 kV at a  
544 nominal magnification of 165 kx (0.83 Å/pixel) with a Quantum K2 camera (Gatan) using a  
545 slit width of 20 eV. Data was collected with an exposure rate of 3.6 electrons/px/s, a total  
546 exposure of 33 electrons/Å<sup>2</sup> and 20 frames per movie.

547

#### 548 Image processing

549 Image processing was performed within the Scipion 2 framework<sup>39</sup>, using RELION-3.0 unless  
550 specified otherwise. Movies were motion-corrected using the RELION implementation of the

551 MotionCor2. 294,054 particles were initially picked using reference-based picking in  
552 Gautomatch (<http://www.mrc-lmb.cam.ac.uk/kzhang/Gautomatch>) and Contrast-transfer  
553 function parameters were using GCTF<sup>40</sup>. Subsequent image processing was performed in  
554 RELION-3.0 and 2D and 3D classification was used to select 100,605 good particles, which  
555 were then extracted in an unbinned 560-pixel box (Fig. S1). An initial model of the ATP  
556 synthase dimer was obtained using *de novo* 3D model generation. Using masked refinement  
557 with applied C<sub>2</sub> symmetry, a 2.7-Å structure of the membrane region was obtained following  
558 per-particle CTF refinement and Bayesian polishing. Following C<sub>2</sub>-symmetry expansion and  
559 signal subtraction of one monomer, a 3.7 Å of the peripheral stalk was obtained. Using 3D  
560 classification (T=100) of aligned particles, with a mask on the F<sub>1</sub>/c-ring region, 10 different  
561 rotational substates were then separated and maps at 3.5-4.3 Å resolution were obtained using  
562 3D refinement. The authors note that the number of classes identified in this study likely  
563 reflects the limited number of particles, rather than the complete conformational space of the  
564 complex. By combining particles from all states belonging to main rotational state 1, a 3.7-Å  
565 map of the rotor and a 3.2-Å consensus map of the complete ATP synthase dimer with both  
566 rotors in main rotational state 1.

567

#### 568 Model building, refinement and data visualisation

569 An initial atomic model of the static F<sub>o</sub> membrane region was automatically built using  
570 Buccaneer<sup>41</sup>. Subunits were subsequently assigned directly from the cryo-EM map, 15 of them  
571 corresponding to previously identified *T. brucei* ATP synthase subunits<sup>21</sup>, while three subunits  
572 (ATPTB14, ATPEG3, ATPEG4) were newly identified using BLAST searches. Manual model  
573 building was performed in *Coot* using the *T. brucei* F<sub>1</sub> (PDB 6F5D) and homology models<sup>42</sup> of  
574 the *E. gracilis* OSCP and c-ring (PDB 6TDU) as starting models. Ligands were manually fitted  
575 to the map and restraints were generated by the GRADE server (<http://grade.globalphasing.org>)  
576 Real-space refinement was performed in PHENIX using auto-sharpened, local-resolution-  
577 filtered maps of the membrane region, peripheral stalk tip, c-ring/central stalk and F<sub>1</sub>F<sub>o</sub>  
578 monomers in different rotational states, using secondary structure restraints. Model statistics  
579 were generated using MolProbity and EMRinger. Finally, the respective refined models were  
580 combined into a composite ATP synthase dimer model and real-space refined against the local-  
581 resolution-filtered consensus ATP synthase dimer map with both monomers in rotational state  
582 1, applying reference restraints. Figures of the structures were prepared using ChimeraX<sup>43</sup>, the  
583 proton half channels were traced using HOLLOW<sup>44</sup>.

584

#### 585 **Data availability**

586 The atomic coordinates have been deposited in the Protein Data Bank (PDB) and are available  
587 under the accession codes: XXX (membrane-region), XXX (peripheral stalk), XXX (rotor),  
588 XXX (F<sub>1</sub>F<sub>o</sub> dimer), XXX (rotational state 1a), XXX (rotational state 1b), XXX (rotational  
589 state 1c), XXX (rotational state 1d), XXX (rotational state 1e), XXX (rotational state 2a), XXX  
590 (rotational state 2b), XXX (rotational state 2c), XXX (rotational state 2d), XXX (rotational  
591 state 3). The local resolution filtered cryo-EM maps, half maps, masks and FSC-curves have  
592 been deposited in the Electron Microscopy Data Bank with the accession codes: EMD-XXX  
593 (membrane-region), EMD-XXX (peripheral stalk), EMD-XXX (rotor), EMD-XXX (F<sub>1</sub>F<sub>o</sub>

594 dimer), EMD-XXX (rotational state 1a), EMD-XXX (rotational state 1b), EMD-XXX  
595 (rotational state 1c), EMD-XXX (rotational state 1d), EMD-XXX (rotational state 1e), EMD-  
596 XXX (rotational state 2a), EMD-XXX (rotational state 2b), EMD-XXX (rotational state 2c),  
597 EMD-XXX (rotational state 2d), EMD-XXX (rotational state 3).

598

## 599 References

- 600 1. Paumard, P. et al. The ATP synthase is involved in generating mitochondrial cristae  
601 morphology. *EMBO J* **21**, 221-30 (2002).
- 602 2. Davies, K.M., Anselmi, C., Wittig, I., Faraldo-Gomez, J.D. & Kuhlbrandt, W. Structure  
603 of the yeast F<sub>1</sub>F<sub>o</sub>-ATP synthase dimer and its role in shaping the mitochondrial cristae.  
604 *Proc Natl Acad Sci U S A* **109**, 13602-7 (2012).
- 605 3. Panek, T., Elias, M., Vancova, M., Lukes, J. & Hashimi, H. Returning to the Fold for  
606 Lessons in Mitochondrial Crista Diversity and Evolution. *Curr Biol* **30**, R575-R588  
607 (2020).
- 608 4. Kuhlbrandt, W. Structure and Mechanisms of F-Type ATP Synthases. *Annu Rev*  
609 *Biochem* **88**, 515-549 (2019).
- 610 5. Spikes, T.E., Montgomery, M.G. & Walker, J.E. Structure of the dimeric ATP synthase  
611 from bovine mitochondria. *Proc Natl Acad Sci U S A* **117**, 23519-23526 (2020).
- 612 6. Pinke, G., Zhou, L. & Sazanov, L.A. Cryo-EM structure of the entire mammalian F-  
613 type ATP synthase. *Nat Struct Mol Biol* **27**, 1077-1085 (2020).
- 614 7. Guo, H., Bueler, S.A. & Rubinstein, J.L. Atomic model for the dimeric F<sub>o</sub> region of  
615 mitochondrial ATP synthase. *Science* **358**, 936-940 (2017).
- 616 8. Murphy, B.J. et al. Rotary substates of mitochondrial ATP synthase reveal the basis of  
617 flexible F<sub>1</sub>-F<sub>o</sub> coupling. *Science* **364**, eaaw9128 (2019).
- 618 9. Flygaard, R.K., Mühleip, A., Tobiasson, V. & Amunts, A. Type III ATP synthase is a  
619 symmetry-deviated dimer that induces membrane curvature through tetramerization.  
620 *Nature Communications* **11**, 5342 (2020).
- 621 10. Muhleip, A., McComas, S.E. & Amunts, A. Structure of a mitochondrial ATP synthase  
622 with bound native cardiolipin. *Elife* **8**, e51179 (2019).
- 623 11. Mühleip, A. et al. ATP synthase hexamer assemblies shape cristae of *Toxoplasma*  
624 mitochondria. *Nature Communications* **12**, 120 (2021).
- 625 12. Gahura, O. et al. The F<sub>1</sub>-ATPase from *Trypanosoma brucei* is elaborated by three  
626 copies of an additional p18-subunit. *FEBS J* **285**, 614-628 (2018).
- 627 13. Montgomery, M.G., Gahura, O., Leslie, A.G.W., Zikova, A. & Walker, J.E. ATP  
628 synthase from *Trypanosoma brucei* has an elaborated canonical F<sub>1</sub>-domain and  
629 conventional catalytic sites. *Proc Natl Acad Sci U S A* **115**, 2102-2107 (2018).
- 630 14. Serricchio, M. et al. Depletion of cardiolipin induces major changes in energy  
631 metabolism in *Trypanosoma brucei* bloodstream forms. *FASEB J* **35**, 21176 (2020).
- 632 15. Muhleip, A.W., Dewar, C.E., Schnauffer, A., Kuhlbrandt, W. & Davies, K.M. In situ  
633 structure of trypanosomal ATP synthase dimer reveals a unique arrangement of  
634 catalytic subunits. *Proc Natl Acad Sci U S A* **114**, 992-997 (2017).

- 635 16. Schnauffer, A., Clark-Walker, G.D., Steinberg, A.G. & Stuart, K. The F<sub>1</sub>-ATP synthase  
636 complex in bloodstream stage trypanosomes has an unusual and essential function.  
637 *EMBO J* **24**, 4029-40 (2005).
- 638 17. Brown, S.V., Hosking, P., Li, J. & Williams, N. ATP synthase is responsible for  
639 maintaining mitochondrial membrane potential in bloodstream form *Trypanosoma*  
640 *brucei*. *Eukaryot Cell* **5**, 45-53 (2006).
- 641 18. Gahura, O., Hierro-Yap, C. & Zikova, A. Redesigned and reversed: Architectural and  
642 functional oddities of the trypanosomal ATP synthase. *Parasitology* **148**, 1151-1160  
643 (2021).
- 644 19. Hierro-Yap, C. et al. Bioenergetic consequences of F<sub>o</sub>F<sub>1</sub>-ATP synthase/ATPase  
645 deficiency in two life cycle stages of *Trypanosoma brucei*. *J Biol Chem* **296**, 100357  
646 (2021).
- 647 20. Gahura, O., Panicucci, B., Vachova, H., Walker, J.E. & Zikova, A. Inhibition of F<sub>1</sub>-  
648 ATPase from *Trypanosoma brucei* by its regulatory protein inhibitor TbIF1. *FEBS J*  
649 **285**, 4413-4423 (2018).
- 650 21. Zikova, A., Schnauffer, A., Dalley, R.A., Panigrahi, A.K. & Stuart, K.D. The F(0)F(1)-  
651 ATP synthase complex contains novel subunits and is essential for procyclic  
652 *Trypanosoma brucei*. *PLoS Pathog* **5**, e1000436 (2009).
- 653 22. Perez, E. et al. The mitochondrial respiratory chain of the secondary green alga *Euglena*  
654 *gracilis* shares many additional subunits with parasitic Trypanosomatidae.  
655 *Mitochondrion* **19 Pt B**, 338-49 (2014).
- 656 23. Sathish Yadav, K.N. et al. Atypical composition and structure of the mitochondrial  
657 dimeric ATP synthase from *Euglena gracilis*. *Biochim Biophys Acta* **1858**, 267-275  
658 (2017).
- 659 24. Aphasizheva, I. et al. Lexis and Grammar of Mitochondrial RNA Processing in  
660 Trypanosomes. *Trends Parasitol* **36**, 337-355 (2020).
- 661 25. Blum, B., Bakalara, N. & Simpson, L. A model for RNA editing in kinetoplastid  
662 mitochondria: "guide" RNA molecules transcribed from maxicircle DNA provide the  
663 edited information. *Cell* **60**, 189-98 (1990).
- 664 26. Adler, B.K., Harris, M.E., Bertrand, K.I. & Hajduk, S.L. Modification of *Trypanosoma*  
665 *brucei* mitochondrial rRNA by posttranscriptional 3' polyuridine tail formation. *Mol*  
666 *Cell Biol* **11**, 5878-84 (1991).
- 667 27. Hofer, A., Steverding, D., Chabes, A., Brun, R. & Thelander, L. *Trypanosoma brucei*  
668 CTP synthetase: a target for the treatment of African sleeping sickness. *Proc Natl Acad*  
669 *Sci U S A* **98**, 6412-6 (2001).
- 670 28. Gupta, K. et al. The role of interfacial lipids in stabilizing membrane protein oligomers.  
671 *Nature* **541**, 421-424 (2017).
- 672 29. Arnold, I., Pfeiffer, K., Neupert, W., Stuart, R.A. & Schagger, H. Yeast mitochondrial  
673 F<sub>1</sub>F<sub>o</sub>-ATP synthase exists as a dimer: identification of three dimer-specific subunits.  
674 *EMBO J* **17**, 7170-8 (1998).
- 675 30. Gu, J. et al. Cryo-EM structure of the mammalian ATP synthase tetramer bound with  
676 inhibitory protein IF1. *Science* **364**, 1068-1075 (2019).

- 677 31. Spikes, T.E., Montgomery, M.G. & Walker, J.E. Interface mobility between monomers  
678 in dimeric bovine ATP synthase participates in the ultrastructure of inner mitochondrial  
679 membranes. *Proc Natl Acad Sci U S A* **118**, e2021012118 (2021).
- 680 32. Cadena, L.R. et al. Mitochondrial contact site and cristae organization system and F<sub>1</sub>F<sub>o</sub>-  
681 ATP synthase crosstalk is a fundamental property of mitochondrial cristae. *mSphere* **6**,  
682 e0032721 (2021).
- 683 33. Davies, K.M. et al. Macromolecular organization of ATP synthase and complex I in  
684 whole mitochondria. *Proc Natl Acad Sci U S A* **108**, 14121-6 (2011).
- 685 34. Blum, T.B., Hahn, A., Meier, T., Davies, K.M. & Kühlbrandt, W. Dimers of  
686 mitochondrial ATP synthase induce membrane curvature and self-assemble into rows.  
687 *Proc Natl Acad Sci U S A* **116**, 4250-4255 (2019).
- 688 35. Bochud-Allemann, N. & Schneider, A. Mitochondrial substrate level phosphorylation  
689 is essential for growth of procyclic *Trypanosoma brucei*. *J Biol Chem* **277**, 32849-54  
690 (2002).
- 691 36. Poon, S.K., Peacock, L., Gibson, W., Gull, K. & Kelly, S. A modular and optimized  
692 single marker system for generating *Trypanosoma brucei* cell lines expressing T7 RNA  
693 polymerase and the tetracycline repressor. *Open Biol* **2**, 110037 (2012).
- 694 37. Allemann, N. & Schneider, A. ATP production in isolated mitochondria of procyclic  
695 *Trypanosoma brucei*. *Mol Biochem Parasitol* **111**, 87-94 (2000).
- 696 38. Aibara, S., Dienemann, C., & Cramer, P.. Structure of an inactive RNA polymerase II  
697 dimer. *Nucleic Acids Research*, gkab783 (2021).
- 698 39. de la Rosa-Trevin, J.M. et al. Scipion: A software framework toward integration,  
699 reproducibility and validation in 3D electron microscopy. *J Struct Biol* **195**, 93-9  
700 (2016).
- 701 40. Zhang, K. Gctf: Real-time CTF determination and correction. *J Struct Biol* **193**, 1-12  
702 (2016).
- 703 41. Cowtan, K. The Buccaneer software for automated model building. 1. Tracing protein  
704 chains. *Acta Crystallogr D Biol Crystallogr* **62**, 1002-11 (2006).
- 705 42. Waterhouse, A. et al. SWISS-MODEL: homology modelling of protein structures and  
706 complexes. *Nucleic Acids Res* **46**, W296-W303 (2018).
- 707 43. Goddard, T.D. et al. UCSF ChimeraX: Meeting modern challenges in visualization and  
708 analysis. *Protein Sci* **27**, 14-25 (2018).
- 709 44. Ho, B.K. & Gruswitz, F. HOLLOW: generating accurate representations of channel  
710 and interior surfaces in molecular structures. *BMC Struct Biol* **8**, 49 (2008).

711

## 712 Acknowledgements

713 We are grateful to Sir John E. Walker and Martin Montgomery for invaluable assistance with  
714 ATP synthase purification in the initial stage of the project. We acknowledge Cryo-electron  
715 microscopy and tomography core facility of CIISB, Instruct-CZ Centre, supported by MEYS  
716 CR (LM2018127). This work was supported by the Czech Science Foundation grants number  
717 18-17529S to A.Z. and 20-04150Y to O.G. and by European Regional Development Fund  
718 (ERDF) and Ministry of Education, Youth and Sport (MEYS) project  
719 CZ.02.1.01/0.0/0.0/16\_019/0000759 to A.Z., Swedish Foundation for Strategic Research

720 (FFL15:0325), Ragnar Söderberg Foundation (M44/16), European Research Council (ERC-  
721 2018-StG-805230), Knut and Alice Wallenberg Foundation (2018.0080), and EMBO Young  
722 Investigator Programme to A.A.

723

724 **Author contributions**

725 O.G. prepared the sample for cryo-EM. O.G. and A.M. performed initial screening. A.M.  
726 processed the cryo-EM data and built the model. B.P., C.H.Y., M.J., M.S., O.G. and A.Z.  
727 performed biochemical analysis. O.G., A.M. and A.A. analyzed the structure. O.G., A.M., A.A.  
728 and A.Z. wrote the manuscript. All authors contributed to the analysis and the final version of  
729 the manuscript.

730 **SUPPLEMENTARY INFORMATION**

731

732 **Supplementary Videos:**

733

734 **Supplementary Video 1. Overall structure and subunit-e/g module of trypanosomal ATP**  
735 **synthase dimers.** Subunits are coloured as in Figure 1. Phospholipids and ligands are shown  
736 as sticks.

737

738 **Supplementary Video 2. Rotary cycle of *T. brucei* ATP synthase.** Top view showing  
739 flexibility of the peripheral stalk, including bending of its apical part, and rotational and tilting  
740 motions of F<sub>1</sub>.

741

742 **Supplementary Video 3. Rotary cycle of *T. brucei* ATP synthase.** Side view showing  
743 rotational and tilting motions of the F<sub>1</sub>/c-ring subcomplex.

744

745

746

747

748

749

750

751

752

753

754

755

756

757

758

759

760

761

762

763

764 **Supplementary Tables:**

765

766 **Supplementary Table 1. List of models and refinement statistics**

|                                            | Mem-brane region                                    | Rotor          | Periphe-ral stalk | F <sub>1</sub> F <sub>0</sub> dimer | Rot. 1a        | Rot. 1b        | Rot. 1c        | Rot. 1d        | Rot. 1e        | Rot. 2a        | Rot. 2b        | Rot. 2c        | Rot. 2d        | Rot. 3         |
|--------------------------------------------|-----------------------------------------------------|----------------|-------------------|-------------------------------------|----------------|----------------|----------------|----------------|----------------|----------------|----------------|----------------|----------------|----------------|
| <b>Data collection</b>                     |                                                     |                |                   |                                     |                |                |                |                |                |                |                |                |                |                |
| Microscope                                 | Titan Krios                                         |                |                   |                                     |                |                |                |                |                |                |                |                |                |                |
| Voltage (kV)                               | 300                                                 |                |                   |                                     |                |                |                |                |                |                |                |                |                |                |
| Camera                                     | K2 Summit                                           |                |                   |                                     |                |                |                |                |                |                |                |                |                |                |
| Magnification                              | 165 kx                                              |                |                   |                                     |                |                |                |                |                |                |                |                |                |                |
| Exposure (e <sup>-</sup> /Å <sup>2</sup> ) | 33                                                  |                |                   |                                     |                |                |                |                |                |                |                |                |                |                |
| Defocus range (µm)                         | -1.6 to -3.2                                        |                |                   |                                     |                |                |                |                |                |                |                |                |                |                |
| Pixel size (Å)                             | 0.83                                                |                |                   |                                     |                |                |                |                |                |                |                |                |                |                |
| Movies collected                           | 5,199                                               |                |                   |                                     |                |                |                |                |                |                |                |                |                |                |
| Frames per movie                           | 20                                                  |                |                   |                                     |                |                |                |                |                |                |                |                |                |                |
| <b>Data processing</b>                     |                                                     |                |                   |                                     |                |                |                |                |                |                |                |                |                |                |
| Initial particles                          | 100,605 (C <sub>2</sub> symmetry-expanded: 201,210) |                |                   |                                     |                |                |                |                |                |                |                |                |                |                |
| Final no. particles                        | 100,605                                             | 118,683        | 201,210           | 36,925                              | 19,764         | 26,427         | 23,019         | 16,991         | 34,482         | 12,173         | 24,096         | 11,035         | 17,833         | 17,312         |
| Symmetry                                   | C <sub>2</sub>                                      | C <sub>1</sub> | C <sub>1</sub>    | C <sub>2</sub>                      | C <sub>1</sub> | C <sub>1</sub> | C <sub>1</sub> | C <sub>1</sub> | C <sub>1</sub> | C <sub>1</sub> | C <sub>1</sub> | C <sub>1</sub> | C <sub>1</sub> | C <sub>1</sub> |
| Map resolution (Å)                         | 2.7                                                 | 3.7            | 3.7               | 3.2                                 | 3.7            | 3.5            | 3.7            | 3.8            | 3.7            | 4.3            | 3.5            | 3.8            | 3.8            | 3.7            |
| Sharpening B factor                        | -46.2                                               | -74.4          | -92.5             | -49.8                               | -61.8          | -61.1          | -57.6          | -45.6          | -58.0          | -73.8          | -54.5          | -65.2          | -54.9          | -61.7          |
| <b>EMD ID</b>                              |                                                     |                |                   |                                     |                |                |                |                |                |                |                |                |                |                |
| <b>Model refinement statistics</b>         |                                                     |                |                   |                                     |                |                |                |                |                |                |                |                |                |                |
| CC (map/model)                             | 0.86                                                | 0.83           | 0.82              | 0.71                                | 0.79           | 0.79           | 0.82           | 0.79           | 0.69           | 0.71           | 0.81           | 0.77           | 0.77           | 0.79           |
| Resolution (map/model)                     | 2.65                                                | 3.4            | 3.68              | 3.13                                | 3.48           | 3.56           | 3.36           | 3.55           | 3.57           | 3.94           | 3.39           | 3.73           | 3.64           | 3.58           |
| No. of atoms                               | 76,690                                              | 19,669         | 12,083            | 251,552                             | 129,568        | 129,568        | 129,568        | 129,568        | 129,568        | 129,563        | 129,563        | 129,563        | 129,563        | 129,566        |
| No. of residues                            | 4074                                                | 1285           | 767               | 15,356                              | 7872           | 7872           | 7872           | 7872           | 7872           | 7872           | 7872           | 7872           | 7872           | 7872           |
| No. of lipids                              | 36                                                  | 0              | 0                 | 36                                  | 21             | 21             | 21             | 21             | 21             | 21             | 21             | 21             | 21             | 21             |
| No. of ATP/ADP                             | 0                                                   | 0              | 0                 | 10                                  | 5              | 5              | 5              | 5              | 5              | 5              | 5              | 5              | 5              | 5              |
| No. of Mg ions                             | 0                                                   | 0              | 0                 | 10                                  | 5              | 5              | 5              | 5              | 5              | 5              | 5              | 5              | 5              | 5              |
| <b>B-factor (Å<sup>2</sup>)</b>            |                                                     |                |                   |                                     |                |                |                |                |                |                |                |                |                |                |
| - protein                                  | 54.05                                               | 56.13          | 77.88             | 84.48                               | 55.65          | 70.37          | 80.22          | 83.27          | 70.70          | 112.72         | 79.93          | 65.52          | 66.49          | 101.5          |
| - ligands                                  | 50.57                                               | 58.25          | -                 | 69.94                               | 40.99          | 72.29          | 63.18          | 78.43          | 63.76          | 75.25          | 74.47          | 61.79          | 46.55          | 83.68          |
| Rotamer outliers (%)                       | 0.44                                                | 0.40           | 0.31              | 0.22                                | 0.42           | 0.09           | 0.18           | 0.26           | 0.58           | 0.18           | 0.27           | 0.48           | 0.42           | 0.39           |
| <b>Ramachandran (%)</b>                    |                                                     |                |                   |                                     |                |                |                |                |                |                |                |                |                |                |
| - outliers                                 | 0.00                                                | 0.00           | 0.00              | 0.01                                | 0.001          | 0.003          | 0.004          | 0.01           | 0.003          | 0.01           | 0.00           | 0.04           | 0.04           | 0.04           |
| - allowed                                  | 1.57                                                | 1.91           | 1.59              | 1.56                                | 1.52           | 1.65           | 1.44           | 1.49           | 1.49           | 1.67           | 1.58           | 1.47           | 1.65           | 1.79           |
| - favored                                  | 98.43                                               | 98.08          | 98.41             | 98.42                               | 98.47          | 98.34          | 98.56          | 98.49          | 98.48          | 98.31          | 98.42          | 98.49          | 98.31          | 98.17          |
| Clash score                                | 1.66                                                | 2.44           | 2.32              | 2.26                                | 2.60           | 2.65           | 2.53           | 2.67           | 2.99           | 2.38           | 2.30           | 2.52           | 2.38           | 3.57           |
| MolProbity score                           | 0.92                                                | 1.03           | 1.01              | 1.00                                | 1.05           | 1.05           | 1.04           | 1.05           | 1.09           | 1.02           | 1.01           | 1.04           | 1.02           | 1.15           |
| <b>RMSD</b>                                |                                                     |                |                   |                                     |                |                |                |                |                |                |                |                |                |                |
| - bonds (Å)                                | 0.004                                               | 0.004          | 0.02              | 0.003                               | 0.003          | 0.003          | 0.004          | 0.003          | 0.003          | 0.002          | 0.003          | 0.003          | 0.003          | 0.003          |
| - angles (°)                               | 0.455                                               | 0.416          | 0.386             | 0.407                               | 0.414          | 0.424          | 0.417          | 0.407          | 0.412          | 0.410          | 0.416          | 0.419          | 0.428          | 0.421          |
| EMRinger score                             | 5.11                                                | 3.96           | 1.61              | 2.56                                | 3.24           | 2.95           | 3.32           | 2.85           | 3.32           | 1.35           | 2.89           | 2.32           | 2.49           | 2.8            |
| <b>PDB ID</b>                              |                                                     |                |                   |                                     |                |                |                |                |                |                |                |                |                |                |

768

769



770 **Supplementary Table 2. Composition of *T. brucei* ATP synthase dimer**

| Subunit name                    | TriTrypDB Lister strain 427 ID                        | TriTrypDB TREU927 strain ID                    | Uniprot TREU927 strain ID | Residues | Residues built     |
|---------------------------------|-------------------------------------------------------|------------------------------------------------|---------------------------|----------|--------------------|
| <b>F<sub>1</sub> subcomplex</b> |                                                       |                                                |                           |          |                    |
| <b><math>\alpha</math></b>      | Tb427_070081800<br>Tb427_070081900                    | Tb927.7.7420<br>Tb927.7.7430                   | Q57TX9                    | 584      | 45-151,<br>161-584 |
| <b><math>\beta</math></b>       | Tb427_030013500                                       | Tb927.3.1380                                   | Q57XX1                    | 519      | 26-514             |
| <b><math>\gamma</math></b>      | Tb427_100005200                                       | Tb927.10.180                                   | B0Z0F6                    | 305      | 2-301              |
| <b><math>\delta</math></b>      | Tb427_060054900                                       | Tb927.6.4990                                   | Q586H1                    | 182      | 22-182             |
| <b><math>\epsilon</math></b>    | Tb427_100054600                                       | Tb427.10.5050                                  | N/A                       | 75       | 11-75              |
| <b>p18</b>                      | Tb427_050022900                                       | Tb927.5.1710                                   | Q57ZP0                    | 188      | 23-188             |
| <b>F<sub>0</sub> subcomplex</b> |                                                       |                                                |                           |          |                    |
| <b>OSCP</b>                     | Tb427_100087100                                       | Tb927.10.8030                                  | Q38AG1                    | 255      | 18-202,<br>208-255 |
| <b><i>a</i></b>                 | mt encoded                                            | mt encoded                                     | N/A                       | 231      | 1-231              |
| <b><i>c</i></b>                 | Tb427_100018700<br>Tb427_110057900<br>Tb427_070019000 | Tb927.10.1570<br>Tb927.11.5280<br>Tb927.7.1470 | Q38C84 Q385P0<br>Q57WQ3   | 118      | 41-118             |
| <b><i>d</i></b>                 | Tb427_050035800                                       | Tb927.5.2930                                   | Q57ZW9                    | 370      | 17-325,<br>332-354 |
| <b><i>e</i></b>                 | Tb427_110010200                                       | Tb927.11.600                                   | N/A                       | 92       | 1-383              |
| <b><i>f</i></b>                 | Tb427_030016600                                       | Tb927.3.1690                                   | Q57ZE2                    | 145      | 2-136              |
| <b><i>g</i></b>                 | Tb427_020016900                                       | Tb927.2.3610                                   | Q586X8                    | 144      | 16-144             |
| <b><i>i/j</i></b>               | Tb427_030029400                                       | Tb927.3.2880                                   | Q57ZM4                    | 104      | 2-104              |
| <b><i>k</i></b>                 | Tb427_070011800                                       | Tb927.7.840                                    | Q57VT0                    | 124      | 20-124             |
| <b><math>\delta</math></b>      | Tb427_040037300                                       | Tb927.4.3450                                   | Q585K5                    | 114      | 29-114             |
| <b>ATBTB1</b>                   | Tb427_100008400                                       | Tb927.10.520                                   | Q38CI8                    | 396      | 1-383              |
| <b>ATPTB3</b>                   | Tb427_110067400                                       | Tb927.11.6250                                  | Q385E4                    | 269      | 2-269              |
| <b>ATPTB4</b>                   | Tb427_100105100                                       | Tb927.10.9830                                  | Q389Z3                    | 157      | 21-157             |
| <b>ATPTB6</b>                   | Tb427_110017200                                       | Tb927.11.1270                                  | Q387C5                    | 169      | 2-169              |
| <b>ATPTB11</b>                  | Tb427_030021500                                       | Tb927.3.2180                                   | Q582T1                    | 156      | 18-156             |
| <b>ATPTB12</b>                  | Tb427_050037400                                       | Tb927.5.3090                                   | Q57Z84                    | 101      | 5-100              |
| <b>ATPTB14</b>                  | Tb427_040009100                                       | Tb927.4.720                                    | Q580A0                    | 105      | 26-105             |
| <b>ATPEG3</b>                   | Tb427_060009300                                       | Tb927.6.590                                    | Q583U4                    | 98       | 14-98              |
| <b>ATPEG4</b>                   | N/A                                                   | Tb927.11.2245                                  | N/A                       | 62       | 1-62               |

771

772

773 **Supplementary Table 3. List of oligonucleotides**

| Subunit                                                  | Primer pair sequences                                                          |
|----------------------------------------------------------|--------------------------------------------------------------------------------|
| <b>Primers for amplification of RNAi cassettes</b>       |                                                                                |
| <i>e</i>                                                 | TAATCTCGAGGGTACCGGGAGTACAGAAGGGCTACA<br>TAGATCTAGAGGATCCCGTGACACCCATCAGCTG     |
| <i>f</i>                                                 | ATACTCGAGGGTACCGTGAGTACCGCCTTTACGC<br>GCGTCTAGAGGATCCAGCACTGATCACCAAACCTGC     |
| <i>g</i>                                                 | ACTGCTCGAGGGTACCACGCGGGAATTCAAAAAGACC<br>GCGGTCTAGAGGATCCCGTTGCGGTGCTTGTCTATA  |
| <i>ij</i>                                                | TAATCTCGAGGGTACCGAATATCCGATGCATGCCGC<br>GCCGTCTAGAGGATCCACTTCGCTCTACTGCATGCA   |
| <i>k</i>                                                 | ATTACTCGAGCCCGGGCGATCAGTGCAGGGGATTTT<br>GCCGTCTAGAGGATCCTTTCCTCGAAAACGCACACA   |
| <b>8</b>                                                 | ATGACTCGAGGGTACCGGGCTATGGTGTGGTATTATGC<br>GACGTCTAGAGGATCCGCAGAAAACCTCCAACGACA |
| <b>ATPTB3</b>                                            | ACTGCTCGAGGGTACCAAAGAGGAGGTGAGGTCTGC<br>GCAGTCTAGAGGATCCCCCTAGGGTTCTTCAAGCA    |
| <b>ATPTB4</b>                                            | CTGACTCGAGGGTACCTTCCTTTTCTGCTGCATCGG<br>GCAGTCTAGAGGATCCCTCCTCGGGCTTCCAATTTG   |
| <b>ATPTB6</b>                                            | ACTGCTCGAGGGTACCCAACATGGCAGTATCCGGTG<br>GCAGTCTAGAGGATCCTTATTAGTGGCGGTGGTGGT   |
| <b>ATPTB11</b>                                           | ACTGCTCGAGGGTACCGCGCTCGTCTTCTCCATTT<br>GCAGAAGCTTGGATCCAGGTTGGGGTGTGTTAGGGAG   |
| <b>ATPTB12</b>                                           | TAATCTCGAGGGTACCGACGCCATCAAAGGAATGCC<br>GCCGTCTAGAGGATCCAGCAGCCAACAAACAGACAA   |
| <b>ATPTB14</b>                                           | TAATCTCGAGGGTACCGTTGAGTGAGGAGGAACGGG<br>GCAGTCTAGAGGATCCTATCCCTTCCACCCACCACT   |
| <b>ATPEG3</b>                                            | TACACTCGAGGGTACCAAACCTGAAGGCCCTCACAC<br>GCAGTCTAGAGGATCCCTCTTTCGTGCCGCCTGATA   |
| <b>Primers for quantification of mRNA levels by qPCR</b> |                                                                                |
| <i>e</i>                                                 | CAAGCCTTGCACACACTTTATG<br>CCGCAAAGAAGTACGCCAC                                  |
| <i>f</i>                                                 | TTTTCTACATACCGCAGCAGT<br>TACCATTCCATGCGCGTTG                                   |
| <i>g</i>                                                 | GCAATTGTGTGAGCTGAACG<br>TACTGGCCGCATTGCATAAC                                   |
| <i>ij</i>                                                | AGAGTAAAAGCGCGCCTACG<br>CAGTTGGAAAACCGGTAGCC                                   |
| <i>k</i>                                                 | ACACAAAACACTTCCAGCAGA                                                          |

|                |                                               |
|----------------|-----------------------------------------------|
|                | CGCTATGACGGACAGGTGT                           |
| <b>8</b>       | GCTACGGCGACTTGGTGC<br>CGTCACCGCGTATTTGTTCA    |
| <b>ATPTB3</b>  | AACGTTTATATCAGCGGGCG<br>CTGTTTTGGTCTGCACACGA  |
| <b>ATPTB4</b>  | CCAAACTTTGAAGCAGCGGA<br>ATTCCTTGGATCCGCACCTT  |
| <b>ATPTB6</b>  | TCGGCATAGGAGAAGTAACGA<br>GATTCGGTTTGGAACTTGCG |
| <b>ATPTB11</b> | CAACGGCCCCACATTCTC<br>ACACCGCGGTCATTCATTG     |
| <b>ATPTB12</b> | GCACTTCATTCTCCCGACTG<br>ACATGATGTAACACCTCCGC  |
| <b>ATPTB14</b> | CCAAGAGTGATGATGGCCCC<br>CGTTTAGGGTCGCGGAAAAC  |
| <b>ATPEG3</b>  | TGGCCCCACATGACTGAAAA<br>GGAAGTGATCCGCCGATT    |

774

775

776

777

778

779

780

781

782

783

784

785

786

787

788

789

790

791

792

793 **Supplementary Table 4. List of antibodies used in this study**

| <b>Target</b>                             | <b>Type</b>       | <b>Reference</b> | <b>Dilution SDS-PAGE</b> | <b>Dilution BN-PAGE</b> |
|-------------------------------------------|-------------------|------------------|--------------------------|-------------------------|
| <b>Primary antibodies</b>                 |                   |                  |                          |                         |
| <b>subunit-<math>\beta</math></b>         | rabbit polyclonal | 1                | 1:2000                   | 1:2000                  |
| <b>p18</b>                                | rabbit polyclonal | 1                | 1:1000                   | -                       |
| <b>ATPTB1</b>                             | rabbit polyclonal | 1                | 1:1000                   | 1:1000                  |
| <b>subunit-<i>d</i></b>                   | rabbit polyclonal | 1                | 1:1000                   | 1:500                   |
| <b>mtHsp70</b>                            | mouse monoclonal  | 2                | 1:5000                   | -                       |
| <b>Secondary antibodies</b>               |                   |                  |                          |                         |
| <b>goat anti-rabbit IgG HRP conjugate</b> |                   | BioRad 1721019   | 1:2000                   | 1:2000                  |
| <b>goat anti-mouse IgG HRP conjugate</b>  |                   | BioRad 1721011   | 1:2000                   | 1:2000                  |

794

795 **Supplementary Figures:**

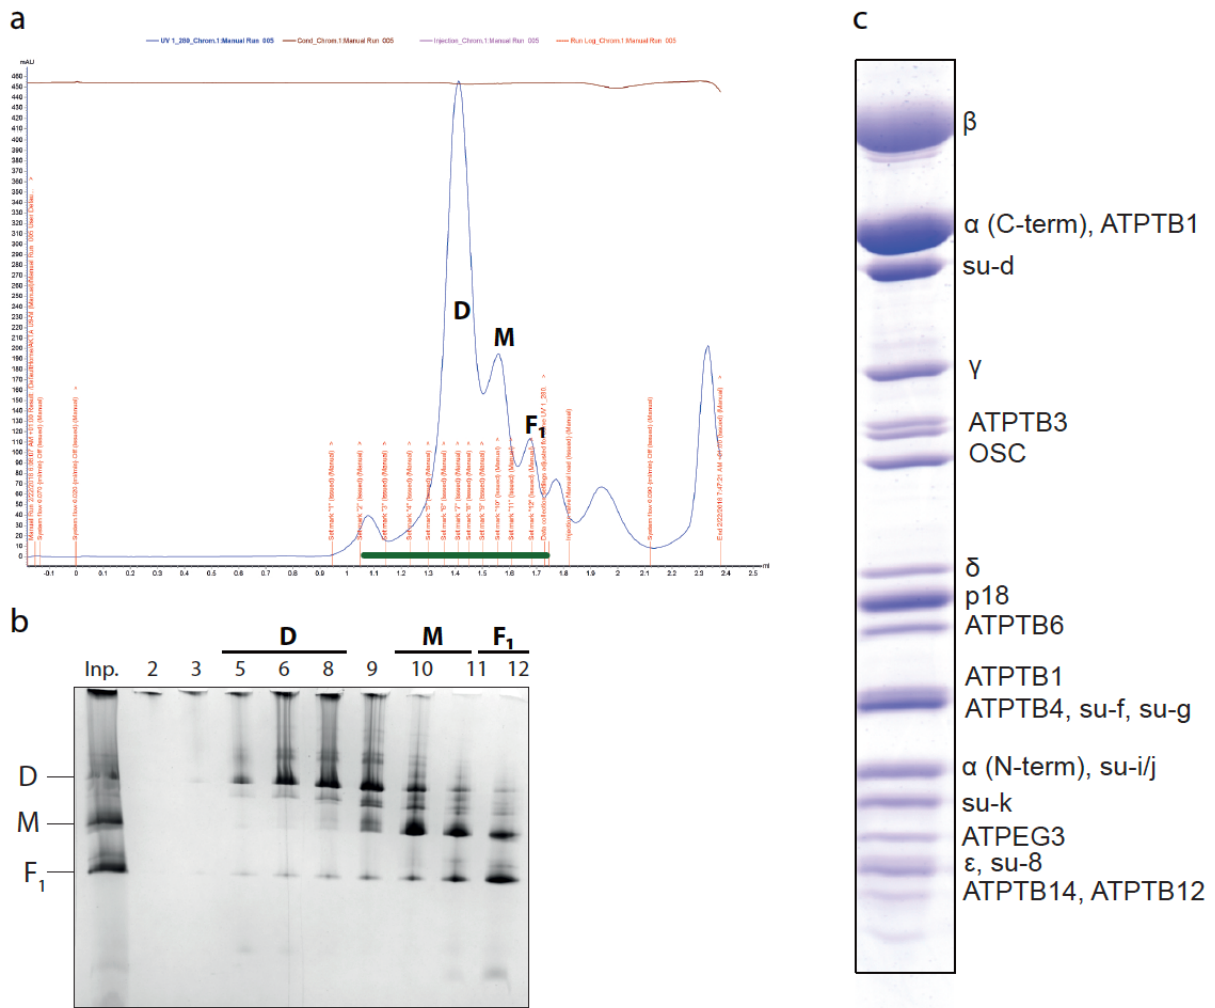

796

797 **Supplementary figure 1: Purification of the *T. brucei* ATP synthase dimer.** **a**, Size  
 798 exclusion chromatography trace with peaks enriched with ATP synthase dimers (D), monomers  
 799 (M) and F<sub>1</sub>-ATPase (F<sub>1</sub>) labelled. **b**, Fractions from size exclusion chromatography marked  
 800 with green bar in (a) resolved by native BN-PAGE. **c**, Dimer-enriched fraction resolved by  
 801 SDS-PAGE stained by Coomassie blue dye. Bands are annotated based on mass spectrometry  
 802 identification from excised gel pieces.

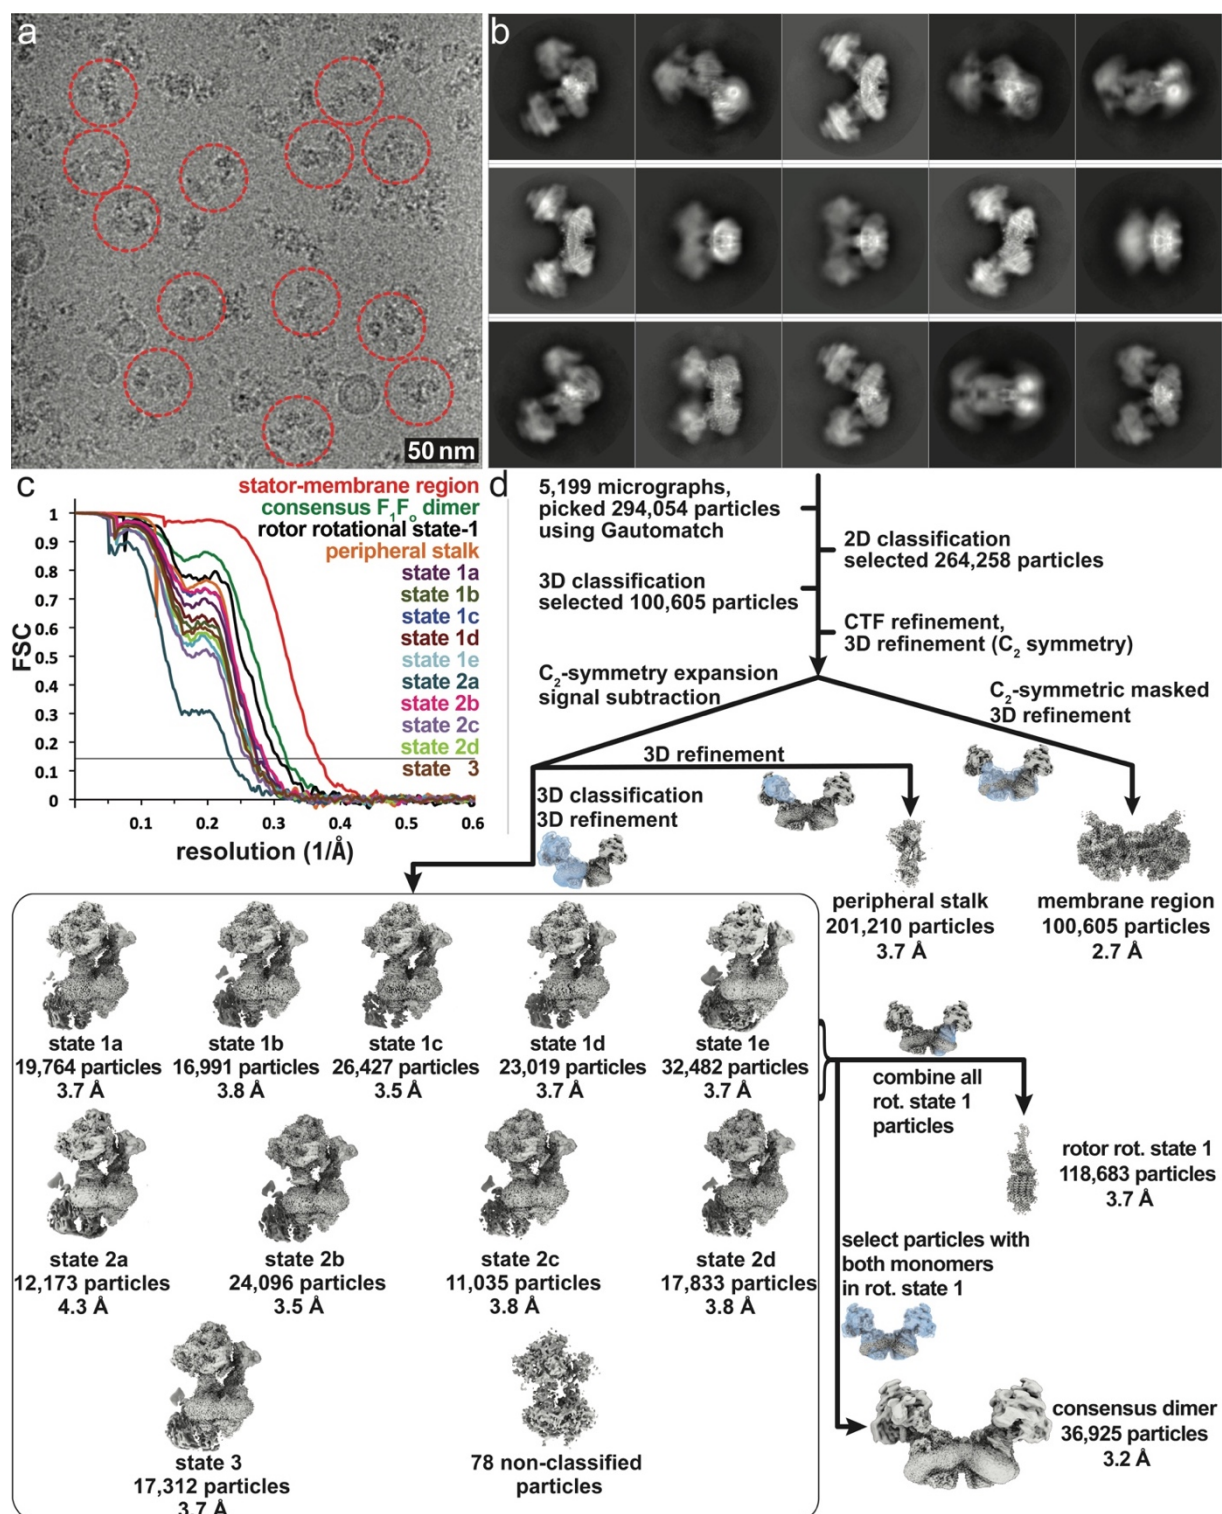

803

804 **Supplementary figure 2: Cryo-EM data processing of the *T. brucei* ATP synthase dimer.**

805 **a**, Representative micrograph. **b**, 2D class averages. **c**, Fourier Shell Correlation (FSC) curves

806 showing the estimated resolutions of ATP synthase maps according to the gold standard 0.143

807 criterion. **d**, Data processing scheme resulting in maps covering all regions of the complex, as

808 well as 10 rotational states.

809

810

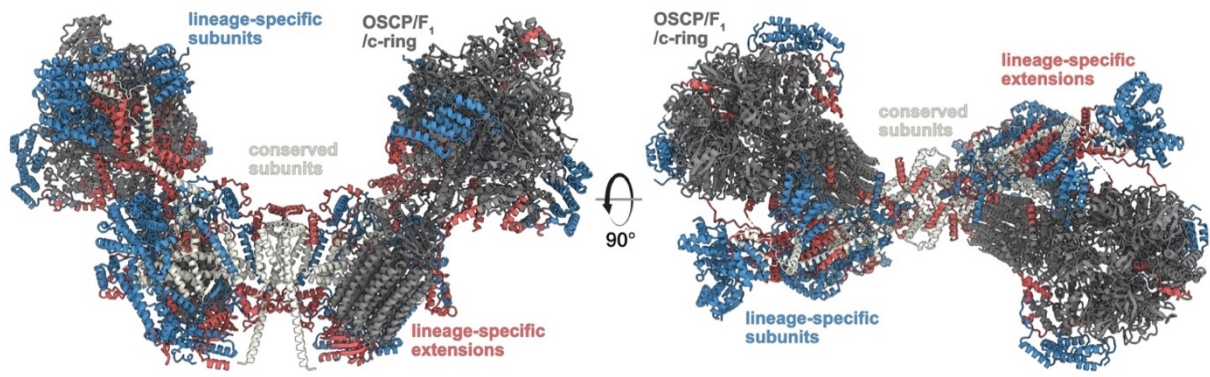

811

812 **Supplementary figure 3: Conserved and phylum specific elements generate the *T. brucei***  
813 **ATP synthase architecture.** The canonical OSCP/F<sub>1</sub>/c-ring monomers (dark grey) are tied  
814 together by both conserved F<sub>o</sub> subunits and extensions of lineage-specific subunits (red). The  
815 F<sub>o</sub> periphery and peripheral stalk attachment are composed of lineage specific subunits (blue).

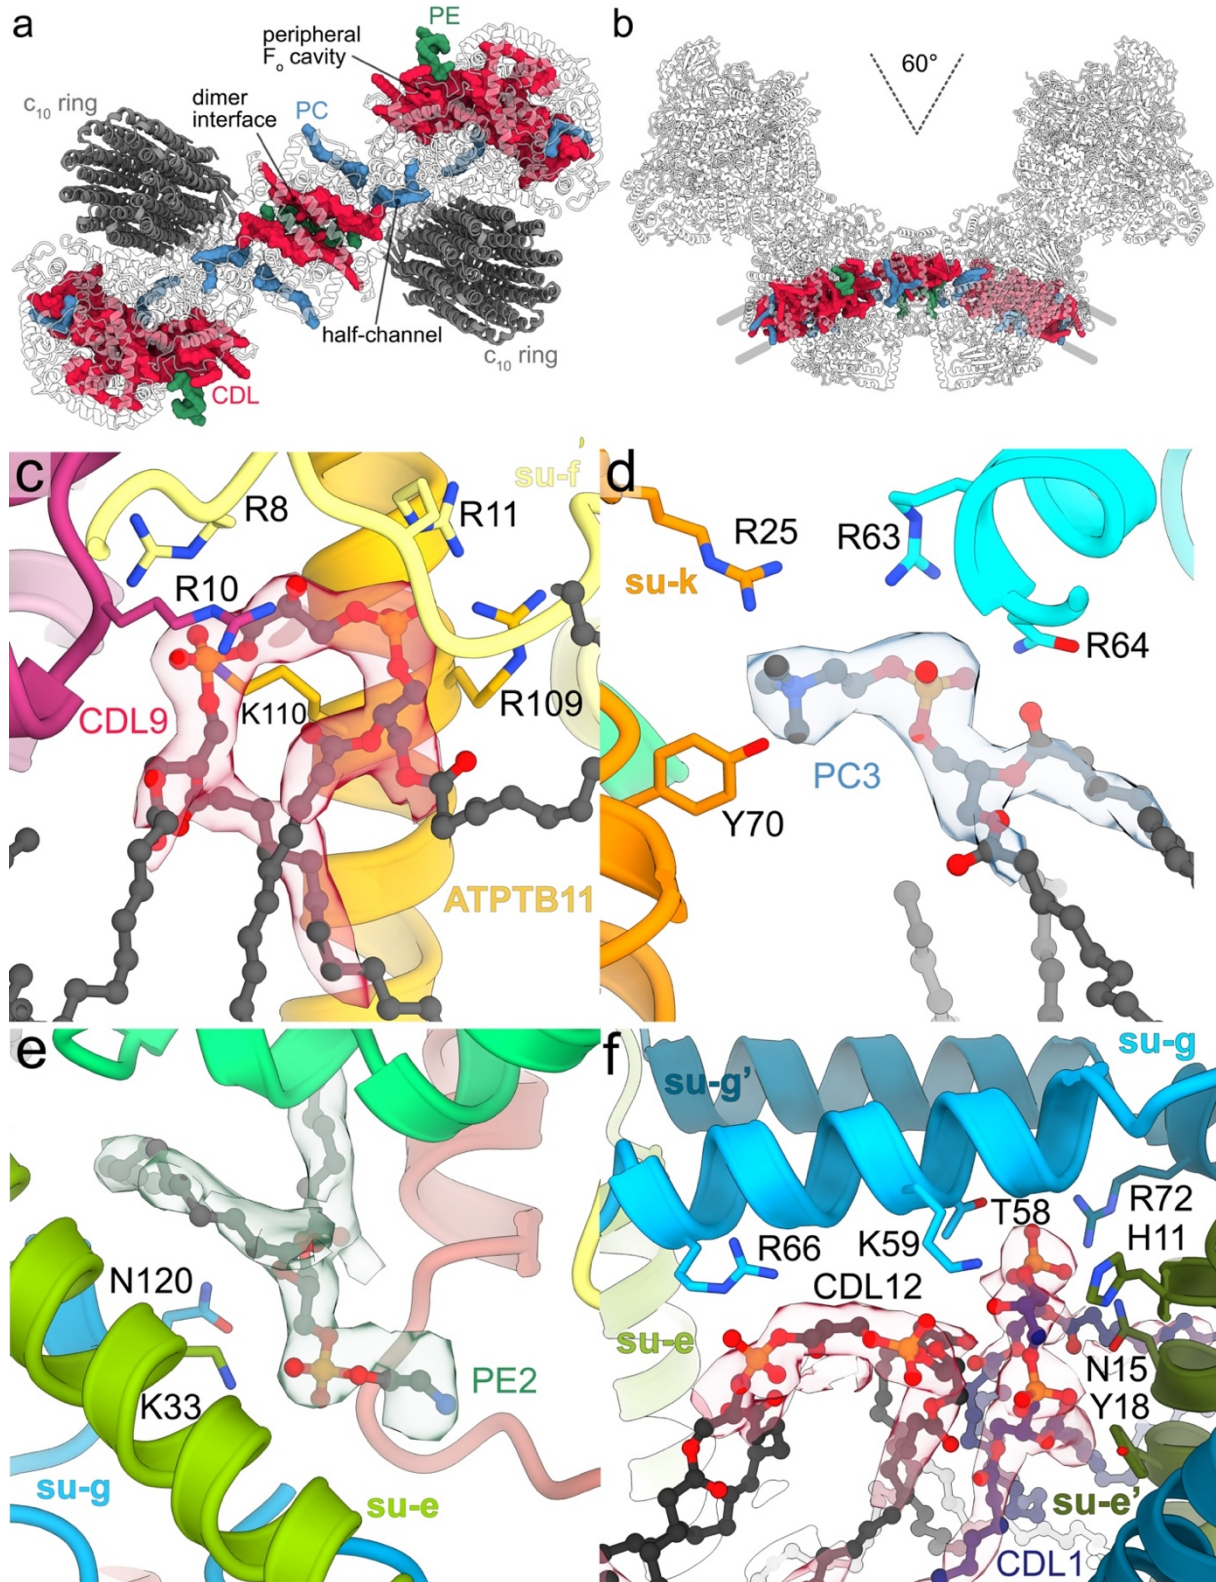

816

817 **Supplementary figure 4: The F<sub>0</sub> region coordinates numerous bound lipids.** **a**, F<sub>0</sub> top view,  
 818 cardiolipin (CDL), phosphatidylcholine (PC) and phosphatidylethanolamine (PE) are bound at  
 819 the dimer interface, the luminal proton half-channel and the peripheral F<sub>0</sub> cavity. **b**, The 60°-  
 820 dimer angle generates a curved F<sub>0</sub> region with phospholipids bound in an arc-shaped bilayer.  
 821 **c-f**, Bound lipids with cryo-EM density and coordinating residues.

822



823

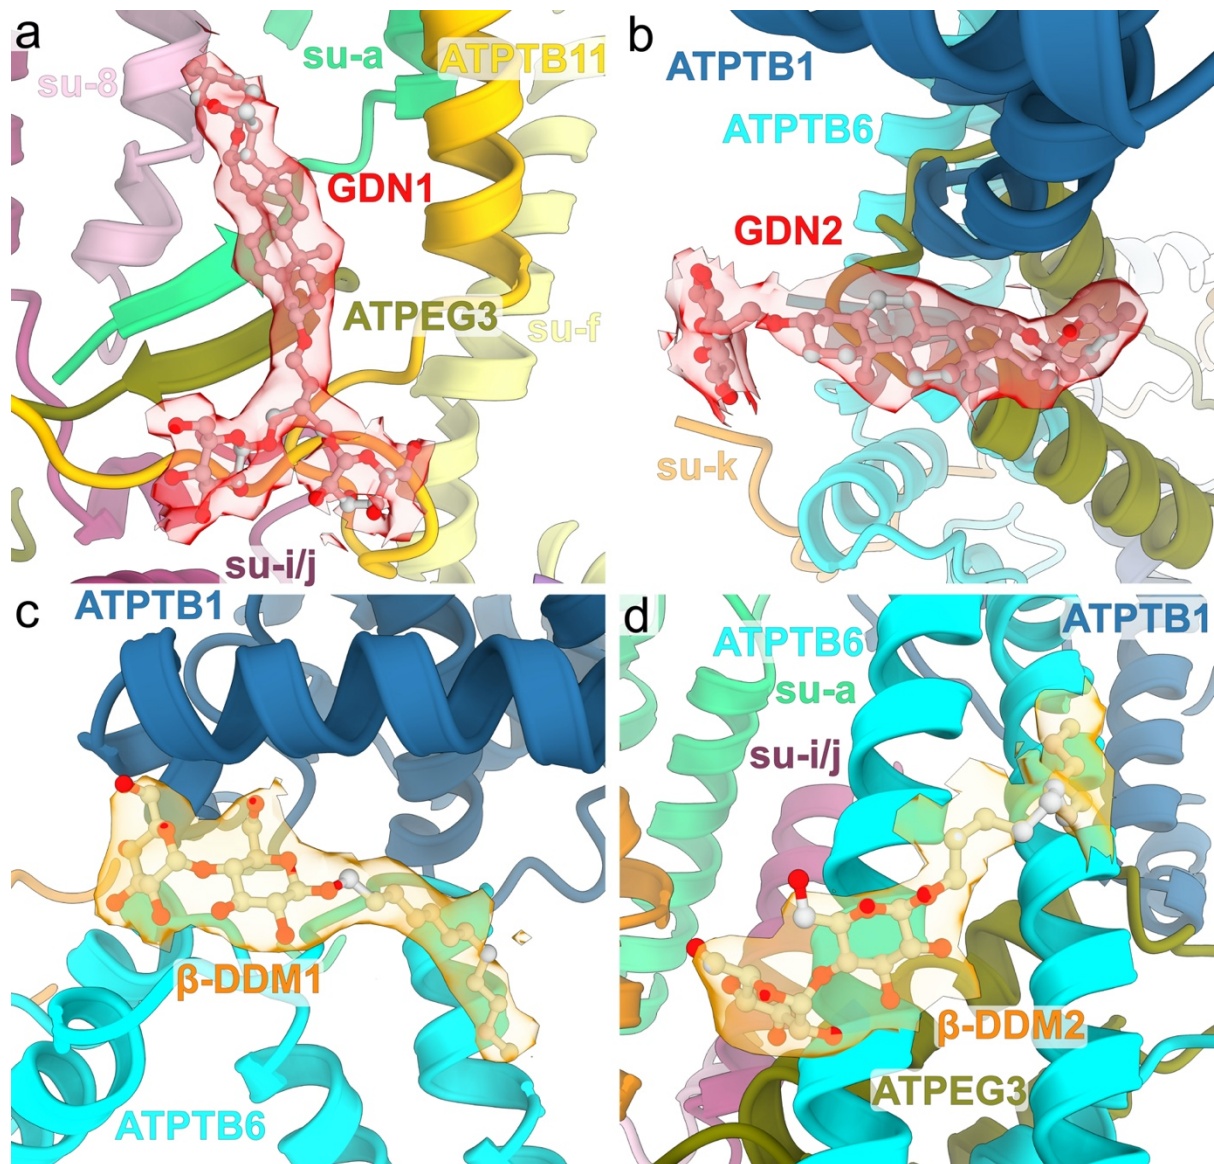

824

825 **Supplementary figure 5: Bound detergents of the F<sub>0</sub> region.** GDN (a,b) and  $\beta$ -DDM (c,d)

826 molecules bound in the periphery of the membrane region with cryo-EM map densities shown

827 (transparent), indicating that both glycosides are retained in the detergent micelle.

828

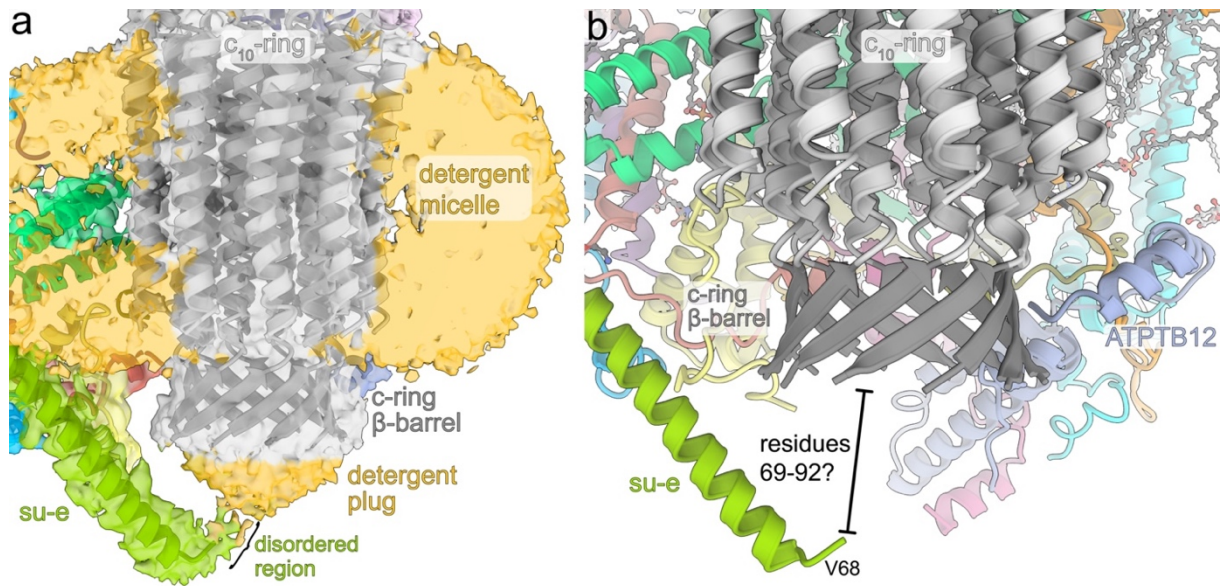

829

830 **Supplementary figure 6. The C-terminal tail of subunit-*e* interacts with the  $c_{10}$ -ring. **a**,**  
831 **The cryo-EM map reveals disordered detergent density of the detergent belt surrounding the**  
832 **membrane region as well as a detergent plug on the luminal side of the  $c$ -ring. **b**, The helical**  
833 **C-terminus of subunit-*e* extends into the lumen towards the  $c$ -ring. The terminal 23 residues**  
834 **are disordered and likely interact with the  $\beta$ -barrel.**

835

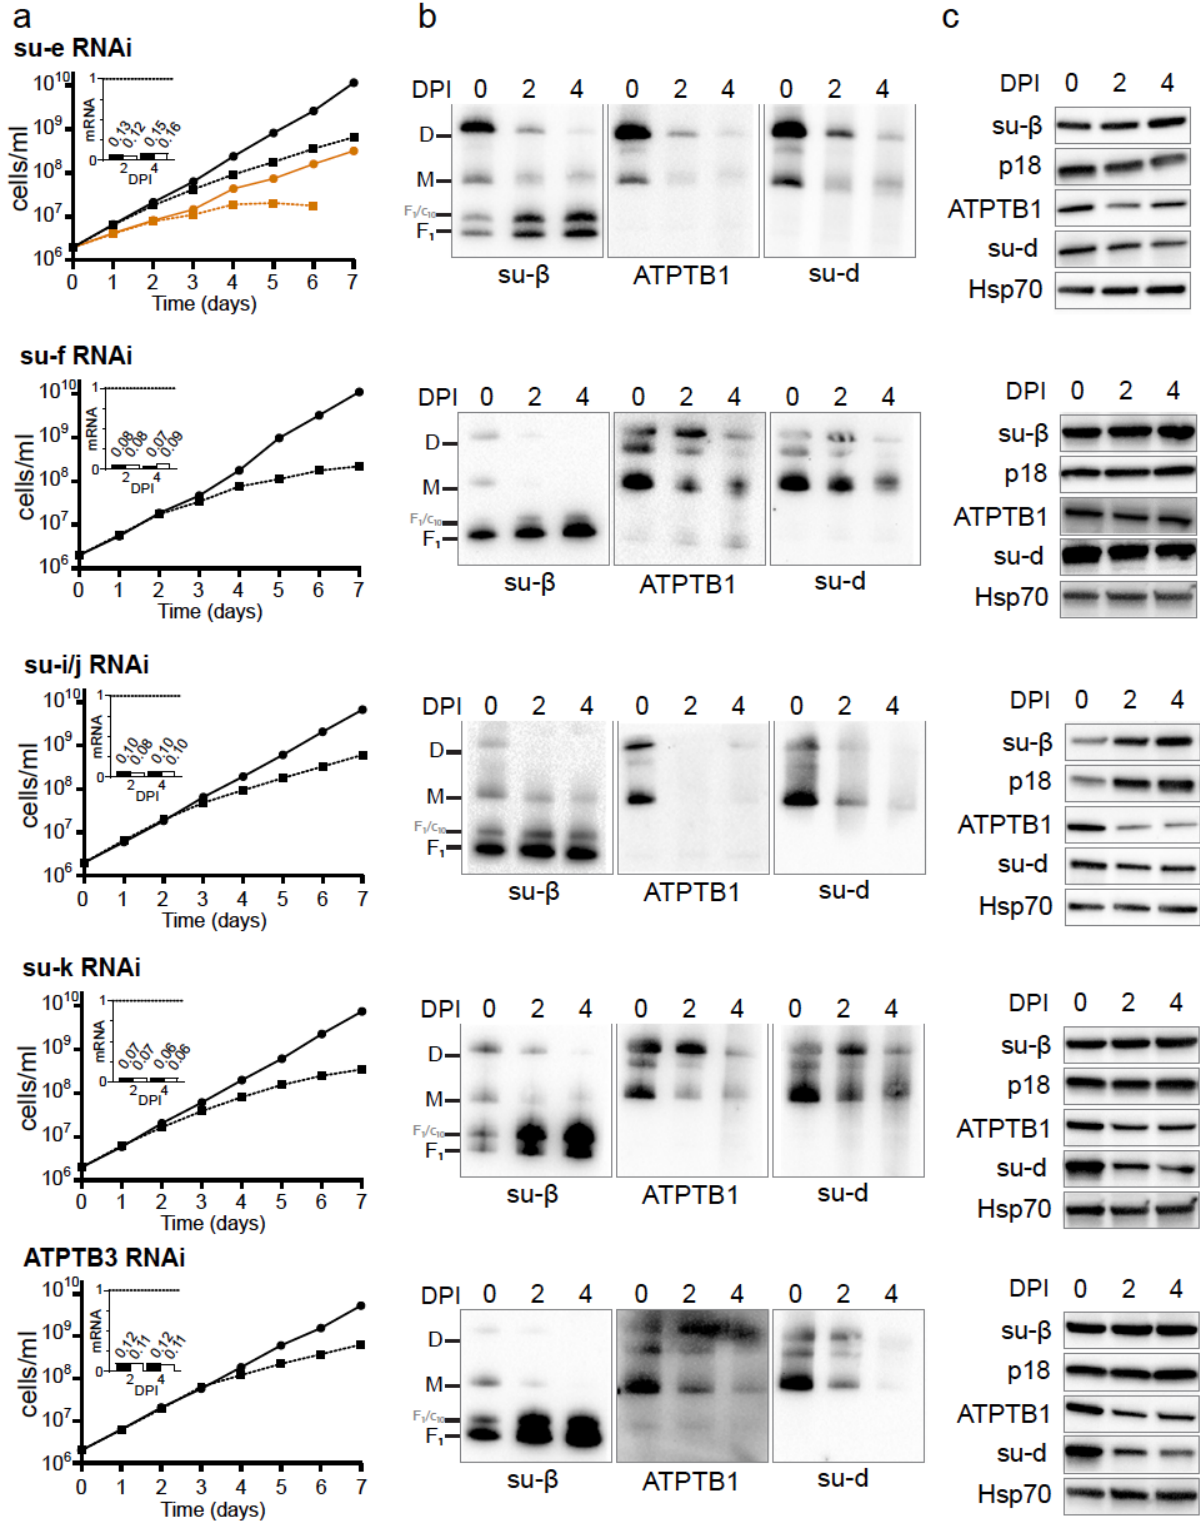

836

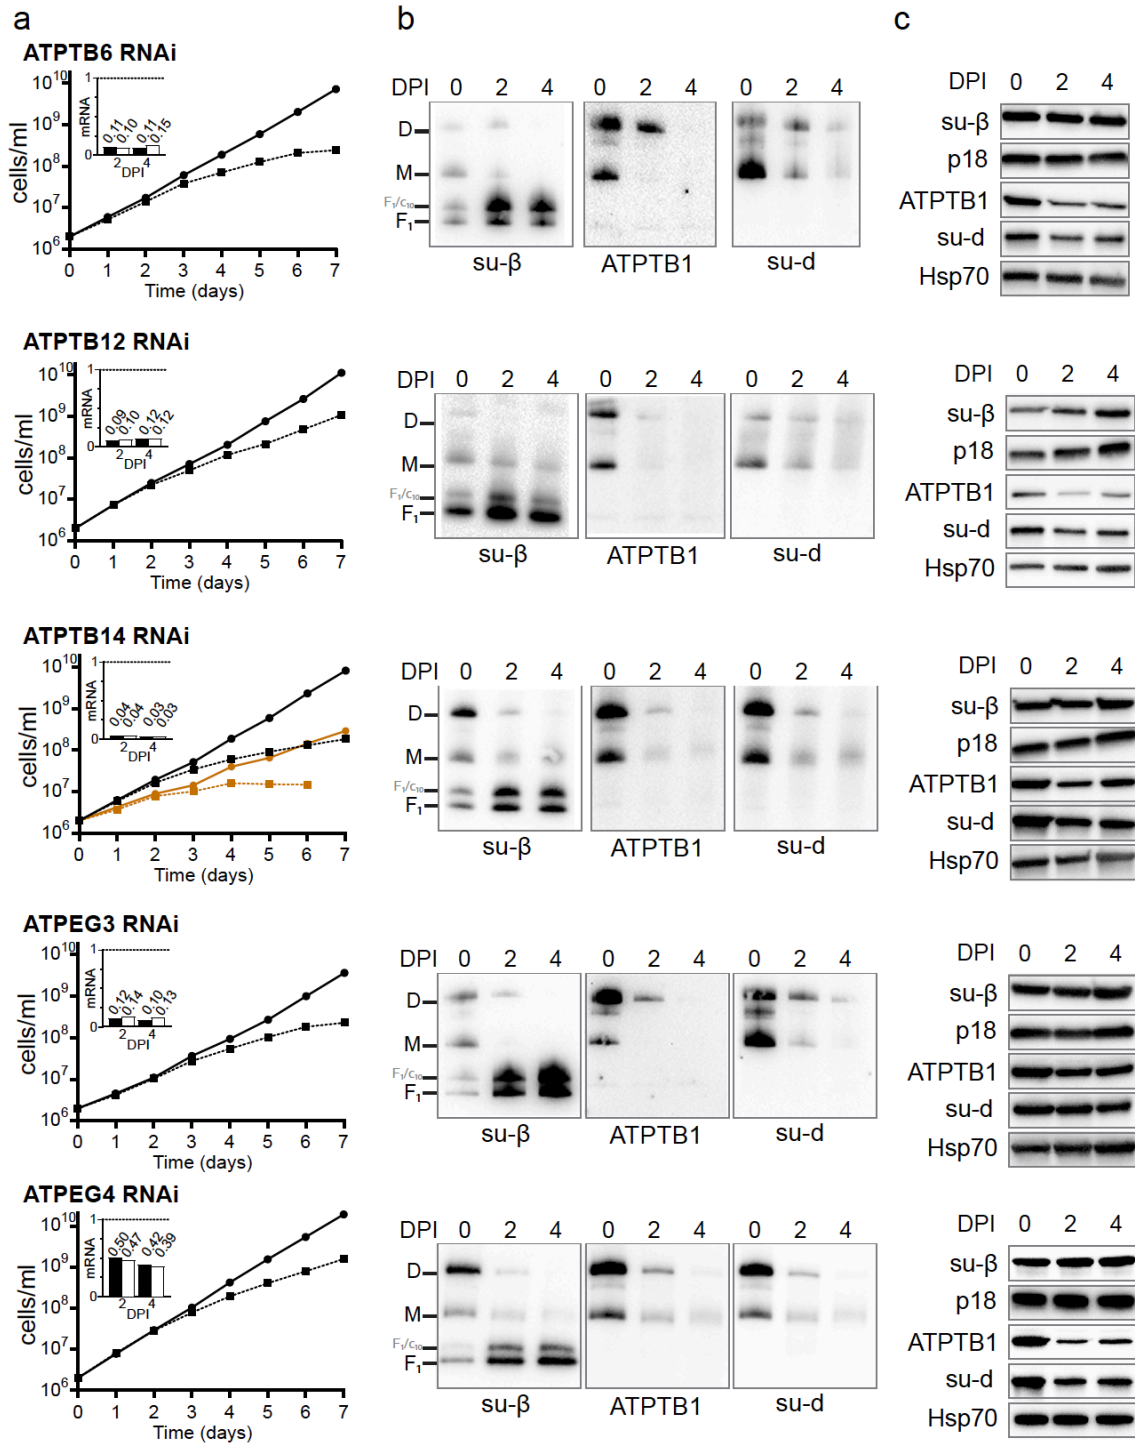

837

838 **Supplementary figure 7. Effects of RNAi knock-down of ATP synthase subunits on**  
 839 **viability and stability and dimerization of ATP synthase. a**, Growth curves of indicated  
 840 non-induced (solid lines) and tetracycline induced (dashed lines) RNAi cells lines in the  
 841 presence (black) or absence (brown) of glucose. The insets show relative levels of the  
 842 respective target mRNA at indicated days post induction (DPI) normalized to the levels of 18S  
 843 rRNA (black bars) or  $\beta$ -tubulin (white bars). **b**, Immunoblots of mitochondrial lysates from  
 844 indicated RNAi cell lines resolved by BN-PAGE probed by antibodies against indicated ATP  
 845 synthase subunits. **c**, Immunoblots of whole cell lysates from indicated RNAi cell lines probed  
 846 with indicated antibodies.

847

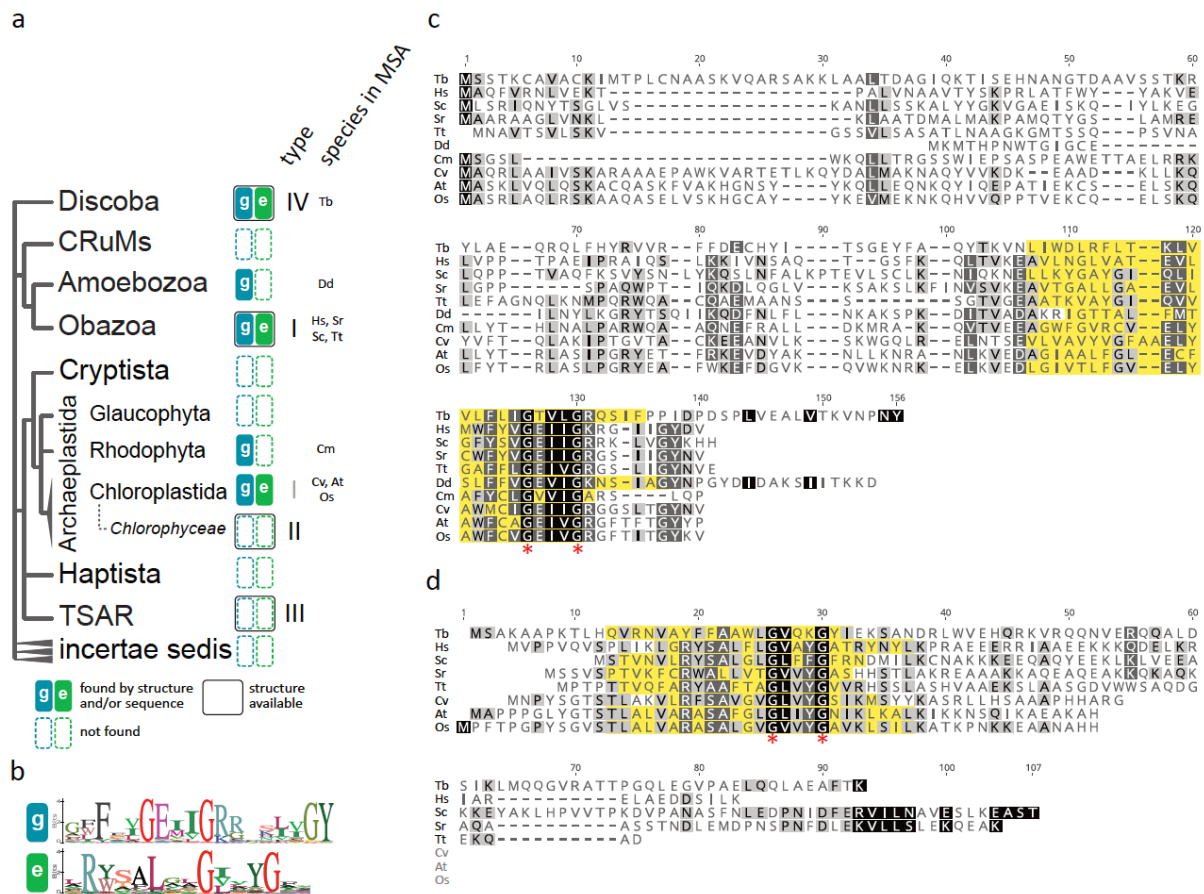

848

849 **Supplementary figure 8: Phylogenetic distribution and sequence conservancy of subunits**

850 **e and g.** **a**, Distribution of subunits *e* and *g* mapped on the phylogenetic tree of eukaryotes<sup>3</sup>.

851 Homologs of subunits *e* and *g* were searched in non-redundant GenBank and UniprotKB

852 protein databases by PSI-BLAST, and phmmer and hmmsearch<sup>4</sup>, respectively, using individual

853 sequences of representatives from *H. sapiens* and *T. brucei*, and in the case of hmmsearch a

854 multiple sequence alignment (MSA) of representatives from *Homo sapiens*, *Saccharomyces*

855 *cerevisiae*, *Arabidopsis thaliana* and *T. brucei*, as queries. Groups, in which at least one

856 structure of ATP synthase is available, are marked. Abbreviations of species used in MSA in

857 panels (c) and (d) are shown. **b**, Sequence logo of GXXXG motifs and flanking regions of

858 subunits *e* and *g*. Hits from hmmsearch were clustered by CD-HIT Suite<sup>5</sup> to 50% sequence

859 identity and MSA of representative sequences of each cluster was generated by Clustal

860 Omega<sup>6</sup>. The sequence logos were created from MSA in Geneious Prime (Biomatters Ltd.).

861 **c,d**, MSA of sequences of subunits *g* (c) and *e* (d) from species representing major groups

862 shown in (a) generated by MUSCLE<sup>7</sup> and visualized in Geneious Prime. The experimentally

863 determined or predicted transmembrane regions are highlighted in yellow. Species

864 abbreviations: Tb – *T. brucei*, Hs – *H. sapiens*, Sc – *S. cerevisiae*, Sr – *Salpingoeca rosetta*, Tt

865 – *Thecamonas trahens*, Dd – *Dictyostelium discoideum*, Cm – *Cyanidioschyzon merolae*, Cv

866 – *Chlorella vulgaris*, At – *Arabidopsis thaliana*, Os – *Oryza sativa*.

867

868

869 **Supplementary references:**

- 870 1. Subrtova, K., Panicucci, B. & Zikova, A. ATPaseTb2, a unique membrane-bound FoF1-  
871 ATPase component, is essential in bloodstream and dyskinetoplastic trypanosomes. *PLoS*  
872 *Pathog* **11**, e1004660 (2015).
- 873 2. Panigrahi, A.K. et al. Mitochondrial complexes in *Trypanosoma brucei*: a novel complex  
874 and a unique oxidoreductase complex. *Mol Cell Proteomics* **7**, 534-45 (2008).
- 875 3. Burki, F., Roger, A.J., Brown, M.W. & Simpson, A.G.B. The New Tree of Eukaryotes.  
876 *Trends Ecol Evol* **35**, 43-55 (2020).
- 877 4. Protein Sequence Similarity Search. *Curr Protoc Bioinformatics* **60**, 3 15 1-3 15 23 (2017).
- 878 5. Huang, Y., Niu, B., Gao, Y., Fu, L. & Li, W. CD-HIT Suite: a web server for clustering and  
879 comparing biological sequences. *Bioinformatics* **26**, 680-2 (2010).
- 880 6. Sievers, F. et al. Fast, scalable generation of high-quality protein multiple sequence  
881 alignments using Clustal Omega. *Mol Syst Biol* **7**, 539 (2011).
- 882 7. Edgar, R.C. MUSCLE: multiple sequence alignment with high accuracy and high  
883 throughput. *Nucleic Acids Res* **32**, 1792-7 (2004).
